# Supplementary material for: Single-cell combined transcriptional sequencing to explore key genes and regulatory mechanisms in diabetic retinopathy
Source: Research Square preprint supplement (doi:10.21203/rs.3.rs-3174202/v1), 2023-07-31
Supplement: Supplementary file 1 [file 05b309acde340b3eceaaf347.xlsx]

## Sheet: Sheet1
p_val	avg_log2FC	pct.1	pct.2	p_val_adj	cluster	gene
0	2.626	0.754	0.363	0	Neurons	Rp1
0	2.33381	0.658	0.216	0	Neurons	Neurod1
0	2.28716	0.736	0.433	0	Neurons	Hk2
0	2.23198	0.738	0.377	0	Neurons	Cnga1
0	2.13997	0.888	0.71	0	Neurons	Pdc
0	2.13469	0.739	0.367	0	Neurons	Elovl4
0	2.11095	0.613	0.238	0	Neurons	Cplx4
0	2.06247	0.767	0.436	0	Neurons	Tulp1
0	1.97817	0.694	0.43	0	Neurons	Pcmtd2
0	1.96065	0.807	0.536	0	Neurons	Guca1a
0	1.95126	0.66	0.313	0	Neurons	Map1b
0	1.94774	0.707	0.345	0	Neurons	Aipl1
0	1.93844	0.516	0.226	0	Neurons	Slc24a1
0	1.92674	0.6	0.297	0	Neurons	Guca1b
0	1.92265	0.898	0.586	0	Neurons	Rom1
0	1.92004	0.617	0.311	0	Neurons	Cngb1
0	1.9127	0.924	0.641	0	Neurons	Unc119
0	1.90566	0.464	0.185	0	Neurons	Pde6a
0	1.9046	0.508	0.163	0	Neurons	Lrit1
0	1.89418	0.539	0.215	0	Neurons	Sncb
0	1.88142	0.821	0.547	0	Neurons	Rcvrn
0	1.86787	0.627	0.287	0	Neurons	Fam57b
0	1.86088	0.674	0.376	0	Neurons	Rtbdn
0	1.86064	0.903	0.766	0	Neurons	Rho
0	1.82041	0.427	0.122	0	Neurons	Rd3
0	1.81383	0.5	0.188	0	Neurons	Osbp2
0	1.78921	0.612	0.244	0	Neurons	Slc17a7
0	1.76866	0.781	0.529	0	Neurons	Sag
0	1.76594	0.531	0.191	0	Neurons	Snap25
0	1.76216	0.558	0.274	0	Neurons	Pde6b
0	1.74326	0.492	0.223	0	Neurons	Cabp4
0	1.74003	0.692	0.46	0	Neurons	Agpat3
0	1.72301	0.634	0.437	0	Neurons	Gnb1
0	1.70543	0.559	0.218	0	Neurons	Syt1
0	1.67294	0.619	0.407	0	Neurons	RGD1597339
0	1.67074	0.976	0.892	0	Neurons	Gngt1
0	1.58372	0.701	0.409	0	Neurons	Pcbp4
0	1.57197	0.941	0.827	0	Neurons	Tma7
0	1.52022	0.909	0.779	0	Neurons	Ldha
0	1.50475	0.791	0.63	0	Neurons	LOC100360316
0	1.48458	0.778	0.582	0	Neurons	Gnat1
0	1.45446	0.468	0.176	0	Neurons	Atp1a3
0	1.35875	0.795	0.631	0	Neurons	LOC100911295
0	1.30933	0.788	0.653	0	Neurons	Atf4
0	-1.00094	0.009	0.286	0	Neurons	Cd82
0	-1.00364	0.043	0.253	0	Neurons	Lmna
0	-1.00568	0.057	0.302	0	Neurons	Qsox1
0	-1.00682	0.036	0.358	0	Neurons	Vgll4
0	-1.00786	0.561	0.854	0	Neurons	Rpl36
0	-1.01566	0.109	0.42	0	Neurons	Rnf13
0	-1.02747	0.346	0.676	0	Neurons	Slc3a2
0	-1.0311	0.602	0.853	0	Neurons	Rps14
0	-1.03444	0.673	0.918	0	Neurons	LOC100359583
0	-1.03834	0.503	0.799	0	Neurons	Rpl29
0	-1.03877	0.263	0.677	0	Neurons	Ppib
0	-1.04819	0.659	0.902	0	Neurons	Fau
0	-1.05039	0.099	0.315	0	Neurons	Ywhah
0	-1.05197	0.121	0.433	0	Neurons	Txn1
0	-1.05606	0.066	0.374	0	Neurons	Nudt4
0	-1.05735	0.084	0.389	0	Neurons	Mgst3
0	-1.06287	0.058	0.335	0	Neurons	Hacd2
0	-1.08529	0.472	0.753	0	Neurons	Rps20
0	-1.08678	0.083	0.44	0	Neurons	Arhgdia
0	-1.09159	0.548	0.795	0	Neurons	Rps18l1
0	-1.09506	0.065	0.268	0	Neurons	Six6
0	-1.09562	0.007	0.254	0	Neurons	Pir
0	-1.1115	0.011	0.255	0	Neurons	Utrn
0	-1.11351	0.67	0.899	0	Neurons	LOC108350501
0	-1.12952	0.06	0.266	0	Neurons	Nrcam
0	-1.13243	0.005	0.289	0	Neurons	RT1-S3
0	-1.13244	0.317	0.621	0	Neurons	LOC100360781
0	-1.13338	0.461	0.767	0	Neurons	LOC100360841
0	-1.13686	0.499	0.804	0	Neurons	Rpl11
0	-1.13766	0.117	0.468	0	Neurons	Fuca1
0	-1.1439	0.126	0.594	0	Neurons	Atp6v0e1
0	-1.14769	0.354	0.763	0	Neurons	Mfge8
0	-1.15197	0.549	0.887	0	Neurons	Hsp90ab1
0	-1.16651	0.008	0.294	0	Neurons	Rras
0	-1.16991	0.093	0.474	0	Neurons	Sdcbp
0	-1.17526	0.002	0.317	0	Neurons	Serpinh1
0	-1.17665	0.007	0.295	0	Neurons	Lpar6
0	-1.17691	0.008	0.258	0	Neurons	Ptgr1
0	-1.17749	0.023	0.25	0	Neurons	Gpld1
0	-1.17909	0.408	0.722	0	Neurons	Rps9
0	-1.18188	0.035	0.324	0	Neurons	Lrp1
0	-1.18291	0.347	0.695	0	Neurons	Pfn1
0	-1.19039	0.072	0.327	0	Neurons	2023-09-04
0	-1.19318	0.463	0.784	0	Neurons	Rpl10
0	-1.19675	0.355	0.696	0	Neurons	Rpl22
0	-1.20005	0.115	0.363	0	Neurons	Cdh2
0	-1.20348	0.002	0.279	0	Neurons	Lamb2
0	-1.21201	0.058	0.413	0	Neurons	Ddah2
0	-1.21405	0.161	0.473	0	Neurons	Nme2
0	-1.21783	0.053	0.281	0	Neurons	Lsamp
0	-1.22217	0.057	0.444	0	Neurons	Lap3
0	-1.2226	0.034	0.391	0	Neurons	Tln1
0	-1.22679	0.031	0.263	0	Neurons	Cdkn1a
0	-1.23223	0.354	0.751	0	Neurons	Tmem59
0	-1.23802	0.08	0.367	0	Neurons	LOC100360087
0	-1.24217	0.003	0.284	0	Neurons	Nrarp
0	-1.24805	0.01	0.331	0	Neurons	Lipa
0	-1.25154	0.136	0.445	0	Neurons	Epas1
0	-1.25492	0.564	0.839	0	Neurons	Rpl27a
0	-1.25916	0.462	0.772	0	Neurons	Rps11
0	-1.27244	0.587	0.836	0	Neurons	Rpl35
0	-1.27285	0.434	0.741	0	Neurons	Rps28
0	-1.28073	0.002	0.29	0	Neurons	Tril
0	-1.2814	0.015	0.25	0	Neurons	Limd2
0	-1.28266	0.018	0.261	0	Neurons	S100b
0	-1.2853	0.033	0.272	0	Neurons	Celsr2
0	-1.29181	0.004	0.295	0	Neurons	Anxa5
0	-1.29386	0.573	0.859	0	Neurons	Rps27
0	-1.29677	0.564	0.827	0	Neurons	Rps16
0	-1.30605	0.27	0.62	0	Neurons	Rpl36al
0	-1.30815	0.052	0.276	0	Neurons	Esam
0	-1.31437	0.088	0.355	0	Neurons	Mt3
0	-1.3203	0.036	0.316	0	Neurons	Ucp2
0	-1.33745	0.111	0.351	0	Neurons	Ppp1r15a
0	-1.33939	0.218	0.674	0	Neurons	Prdx1
0	-1.33945	0.011	0.291	0	Neurons	Id2
0	-1.3425	0.071	0.316	0	Neurons	Cd320
0	-1.35015	0.642	0.923	0	Neurons	Rplp1
0	-1.35114	0.003	0.386	0	Neurons	Msn
0	-1.3543	0.364	0.713	0	Neurons	Rps5
0	-1.36313	0.065	0.406	0	Neurons	Gsta4
0	-1.37111	0.129	0.424	0	Neurons	Tsc22d3
0	-1.37444	0.011	0.258	0	Neurons	Omg
0	-1.37493	0.014	0.274	0	Neurons	Igf2
0	-1.37573	0.032	0.269	0	Neurons	Tf
0	-1.38773	0.628	0.896	0	Neurons	Rpl37a
0	-1.39063	0.03	0.293	0	Neurons	Slc6a1
0	-1.39542	0.58	0.868	0	Neurons	Rps23
0	-1.40937	0.065	0.373	0	Neurons	Gpx1
0	-1.41348	0.15	0.458	0	Neurons	Scd2
0	-1.41794	0.026	0.293	0	Neurons	B3gnt2
0	-1.41959	0.158	0.54	0	Neurons	Ctsb
0	-1.43523	0.006	0.261	0	Neurons	Lmo2
0	-1.45091	0.487	0.783	0	Neurons	Rps4x
0	-1.4539	0.003	0.271	0	Neurons	Cavin1
0	-1.46947	0.015	0.356	0	Neurons	Cd302
0	-1.49144	0.047	0.317	0	Neurons	Ier5
0	-1.49211	0.007	0.277	0	Neurons	Sox9
0	-1.4983	0.108	0.53	0	Neurons	Psme1
0	-1.51178	0.026	0.313	0	Neurons	Rbp1
0	-1.51476	0.203	0.684	0	Neurons	Atox1
0	-1.52541	0.255	0.611	0	Neurons	Jund
0	-1.52808	0.007	0.283	0	Neurons	Lhx2
0	-1.53201	0.291	0.598	0	Neurons	Tsc22d1
0	-1.54675	0.099	0.48	0	Neurons	Gng10
0	-1.55557	0.094	0.591	0	Neurons	Gnb2
0	-1.56001	0.003	0.365	0	Neurons	Pmp22
0	-1.56079	0.417	0.818	0	Neurons	Myl6
0	-1.57164	0.002	0.301	0	Neurons	Ifitm2
0	-1.57361	0.131	0.493	0	Neurons	Gstp1
0	-1.5778	0.047	0.39	0	Neurons	Sh3bgrl3
0	-1.58998	0.075	0.363	0	Neurons	Slmap
0	-1.59097	0.004	0.338	0	Neurons	Rarres2
0	-1.59254	0.051	0.301	0	Neurons	Cebpb
0	-1.59594	0.017	0.43	0	Neurons	Itgb1
0	-1.59645	0.006	0.405	0	Neurons	Prss23
0	-1.61074	0.019	0.423	0	Neurons	Cnn3
0	-1.61221	0.006	0.279	0	Neurons	Slitrk2
0	-1.61484	0.01	0.408	0	Neurons	S100a16
0	-1.61519	0.035	0.354	0	Neurons	Mt1
0	-1.61555	0.003	0.425	0	Neurons	Notch1
0	-1.61569	0.002	0.3	0	Neurons	Ahnak
0	-1.62329	0.002	0.441	0	Neurons	Fcgrt
0	-1.62671	0.004	0.256	0	Neurons	Hhatl
0	-1.62876	0.003	0.283	0	Neurons	Tnfaip6
0	-1.62949	0.05	0.346	0	Neurons	Grn
0	-1.6342	0.01	0.466	0	Neurons	Rhoc
0	-1.63809	0.024	0.308	0	Neurons	Spon1
0	-1.64571	0.037	0.4	0	Neurons	Ndrg2
0	-1.65593	0.009	0.275	0	Neurons	LOC100911545
0	-1.65949	0.014	0.384	0	Neurons	Pla2g16
0	-1.6728	0.171	0.654	0	Neurons	Itm2c
0	-1.6733	0.667	0.923	0	Neurons	Tpt1
0	-1.68928	0.07	0.439	0	Neurons	Cd99
0	-1.69041	0.003	0.289	0	Neurons	Car14
0	-1.69461	0.139	0.38	0	Neurons	Egr1
0	-1.70411	0.416	0.747	0	Neurons	Rps12
0	-1.70422	0.002	0.283	0	Neurons	Bcam
0	-1.70518	0.003	0.336	0	Neurons	Arhgdib
0	-1.71842	0.044	0.342	0	Neurons	Rhob
0	-1.72822	0.167	0.395	0	Neurons	Ttyh1
0	-1.73488	0.011	0.407	0	Neurons	Cav2
0	-1.74248	0.014	0.318	0	Neurons	Csrp1
0	-1.74881	0.044	0.537	0	Neurons	RT1-CE4
0	-1.76809	0.012	0.334	0	Neurons	Cryab
0	-1.77601	0.086	0.368	0	Neurons	Tgfb2
0	-1.78366	0.012	0.388	0	Neurons	Mdk
0	-1.78519	0.005	0.416	0	Neurons	Oaf
0	-1.78589	0.008	0.361	0	Neurons	Plpp3
0	-1.78785	0.564	0.932	0	Neurons	Itm2b
0	-1.79039	0.006	0.512	0	Neurons	Clic1
0	-1.79766	0.01	0.281	0	Neurons	Klf4
0	-1.7993	0.002	0.375	0	Neurons	Arpc1b
0	-1.80975	0.268	0.713	0	Neurons	Cd63
0	-1.8284	0.051	0.368	0	Neurons	Ifngr1
0	-1.8418	0.635	0.938	0	Neurons	Fth1
0	-1.84933	0.002	0.421	0	Neurons	Cd48
0	-1.8513	0.01	0.313	0	Neurons	Id4
0	-1.85142	0.002	0.34	0	Neurons	Clec2g
0	-1.87468	0.004	0.297	0	Neurons	Agt
0	-1.8875	0.012	0.297	0	Neurons	Cavin3
0	-1.90212	0.009	0.318	0	Neurons	Espn
0	-1.906	0.029	0.354	0	Neurons	Ddr1
0	-1.91896	0.018	0.296	0	Neurons	Cald1
0	-1.92005	0.012	0.539	0	Neurons	Pon2
0	-1.92027	0.17	0.506	0	Neurons	Cox4i2
0	-1.92143	0.117	0.576	0	Neurons	Marcks
0	-1.93365	0.03	0.317	0	Neurons	Tpm1
0	-1.93428	0.006	0.307	0	Neurons	Sox2
0	-1.94138	0.015	0.509	0	Neurons	Crip2
0	-1.94651	0.004	0.514	0	Neurons	Cyba
0	-1.95436	0.003	0.404	0	Neurons	Txnip
0	-1.9842	0.005	0.321	0	Neurons	Efemp1
0	-1.99505	0.035	0.461	0	Neurons	Timp2
0	-1.99529	0.004	0.264	0	Neurons	Itm2a
0	-2.00138	0.264	0.759	0	Neurons	Actb
0	-2.01171	0.173	0.532	0	Neurons	Sec11c
0	-2.03957	0.145	0.728	0	Neurons	Cd81
0	-2.04742	0.102	0.504	0	Neurons	Rnaset2
0	-2.04797	0.008	0.331	0	Neurons	Aqp4
0	-2.07231	0.182	0.763	0	Neurons	Laptm4a
0	-2.07911	0.003	0.357	0	Neurons	Fxyd5
0	-2.08863	0.137	0.452	0	Neurons	Acsl3
0	-2.09493	0.029	0.602	0	Neurons	LOC108349548
0	-2.10378	0.005	0.305	0	Neurons	Plat
0	-2.10768	0.136	0.413	0	Neurons	Crym
0	-2.11715	0.003	0.496	0	Neurons	Zfp36l1
0	-2.12236	0.003	0.284	0	Neurons	Ifitm3
0	-2.13274	0.008	0.341	0	Neurons	Mlc1
0	-2.13473	0.295	0.815	0	Neurons	Psap
0	-2.19862	0.013	0.501	0	Neurons	Cav1
0	-2.20515	0.011	0.329	0	Neurons	Tagln2
0	-2.21461	0.139	0.384	0	Neurons	Gpm6a
0	-2.22538	0.009	0.398	0	Neurons	Cebpd
0	-2.23051	0.068	0.623	0	Neurons	Atp1b3
0	-2.23641	0.096	0.586	0	Neurons	Myl12a
0	-2.24976	0.137	0.419	0	Neurons	Dusp1
0	-2.25805	0.007	0.291	0	Neurons	Hspb1
0	-2.26892	0.061	0.401	0	Neurons	Ier3
0	-2.2748	0.224	0.653	0	Neurons	Dbi
0	-2.27631	0.013	0.367	0	Neurons	Frzb
0	-2.28505	0.017	0.435	0	Neurons	Fxyd1
0	-2.28516	0.107	0.728	0	Neurons	Gnai2
0	-2.28522	0.007	0.477	0	Neurons	Hes1
0	-2.29479	0.037	0.609	0	Neurons	Lamp2
0	-2.32021	0.048	0.473	0	Neurons	Hopx
0	-2.3507	0.008	0.34	0	Neurons	Zfp36
0	-2.35319	0.008	0.352	0	Neurons	Rrh
0	-2.37649	0.313	0.838	0	Neurons	Ftl1
0	-2.37856	0.128	0.45	0	Neurons	Slc2a1
0	-2.41374	0.004	0.345	0	Neurons	Srgn
0	-2.41826	0.005	0.372	0	Neurons	Flt1
0	-2.43613	0.219	0.521	0	Neurons	Jun
0	-2.44766	0.022	0.443	0	Neurons	Htra1
0	-2.47371	0.014	0.364	0	Neurons	Gpr37
0	-2.52427	0.16	0.448	0	Neurons	Fos
0	-2.52861	0.308	0.526	0	Neurons	Car2
0	-2.52982	0.21	0.604	0	Neurons	LOC100364435
0	-2.54791	0.085	0.635	0	Neurons	Sat1
0	-2.56155	0.035	0.566	0	Neurons	Ifi27
0	-2.573	0.017	0.456	0	Neurons	Il33
0	-2.61311	0.005	0.385	0	Neurons	Tm4sf1
0	-2.63386	0.015	0.372	0	Neurons	Abca8a
0	-2.65772	0.091	0.564	0	Neurons	Npc2
0	-2.70431	0.174	0.788	0	Neurons	Ctsl
0	-2.70508	0.008	0.592	0	Neurons	Ctsh
0	-2.82396	0.209	0.679	0	Neurons	Igfbp7
0	-2.87979	0.005	0.361	0	Neurons	Tmem176a
0	-3.03199	0.039	0.506	0	Neurons	Csrp2
0	-3.05817	0.011	0.464	0	Neurons	Id1
0	-3.08497	0.233	0.486	0	Neurons	Clu
0	-3.09972	0.016	0.472	0	Neurons	Slc1a3
0	-3.12344	0.025	0.528	0	Neurons	Ptn
0	-3.1281	0.033	0.39	0	Neurons	Rlbp1
0	-3.1422	0.075	0.399	0	Neurons	Dkk3
0	-3.23924	0.007	0.259	0	Neurons	Crip1
0	-3.23993	0.008	0.585	0	Neurons	Tmem176b
0	-3.24039	0.012	0.378	0	Neurons	Penk
0	-3.2484	0.008	0.397	0	Neurons	Anxa3
0	-3.27605	0.023	0.475	0	Neurons	Kdr
0	-3.3102	0.116	0.48	0	Neurons	Junb
0	-3.322	0.027	0.383	0	Neurons	Pltp
0	-3.48453	0.024	0.682	0	Neurons	Vim
0	-3.52156	0.055	0.41	0	Neurons	Gsta1
0	-3.70348	0.028	0.889	0	Neurons	Sparc
0	-3.77627	0.017	0.669	0	Neurons	Cd9
0	-3.84811	0.035	0.667	0	Neurons	Id3
0	-3.96614	0.471	0.953	0	Neurons	Tmsb4x
0	-3.98456	0.008	0.259	0	Neurons	Mgp
0	-4.00206	0.101	0.901	0	Neurons	B2m
0	-4.04347	0.074	0.667	0	Neurons	Glul
0	-4.26996	0.738	0.979	0	Neurons	Cst3
0	-5.29136	0.101	0.859	0	Neurons	Apoe
6.47677e-306	-1.8184	0.597	0.832	1.64504e-301	Neurons	Bsg
1.78074e-304	1.36222	0.546	0.301	4.5229e-300	Neurons	Scg5
1.48253e-302	1.77554	0.411	0.127	3.76547e-298	Neurons	Ppef2
1.9901e-301	1.45632	0.51	0.255	5.05465e-297	Neurons	Got1
7.05943e-301	1.55503	0.5	0.233	1.79302e-296	Neurons	Arl6
1.52127e-300	-1.20367	0.076	0.253	3.86387e-296	Neurons	Sparcl1
3.84968e-299	-1.07356	0.461	0.719	9.7778e-295	Neurons	LOC100361854
1.103e-298	1.83651	0.437	0.163	2.8015e-294	Neurons	AABR07068851.1
3.2337e-297	1.80067	0.479	0.214	8.21327e-293	Neurons	Cep290
1.88341e-296	1.39257	0.569	0.341	4.78366e-292	Neurons	Hist3h2ba
5.43816e-296	1.72621	0.422	0.14	1.38124e-291	Neurons	Rims2
8.48189e-291	1.5505	0.539	0.297	2.15432e-286	Neurons	Slc6a6
1.68222e-276	1.70738	0.458	0.2	4.27266e-272	Neurons	Rgs9
2.09608e-274	-1.36357	0.258	0.497	5.32383e-270	Neurons	Nfkbia
1.0069e-268	1.69211	0.442	0.189	2.55743e-264	Neurons	Kcnb1
1.55201e-264	1.63345	0.451	0.199	3.94194e-260	Neurons	Nxnl2
2.51887e-255	2.13028	0.353	0.101	6.39767e-251	Neurons	RGD1560925
2.29538e-236	1.14839	0.772	0.729	5.83004e-232	Neurons	Rsrp1
4.07836e-235	1.4134	0.623	0.471	1.03586e-230	Neurons	Cited2
3.29745e-228	1.64968	0.353	0.117	8.37518e-224	Neurons	Ankrd33b
3.71742e-222	1.45233	0.372	0.134	9.44187e-218	Neurons	Ppp2r2b
3.3551e-220	1.34395	0.548	0.373	8.52163e-216	Neurons	Kif1b
5.09383e-217	1.64186	0.411	0.196	1.29378e-212	Neurons	Cep164
3.16266e-215	1.5863	0.385	0.162	8.03284e-211	Neurons	Cdhr1
8.15713e-211	1.46951	0.363	0.138	2.07183e-206	Neurons	Tsks
4.60666e-210	1.33057	0.334	0.105	1.17005e-205	Neurons	Stmn3
6.79863e-209	1.19078	0.301	0.075	1.72678e-204	Neurons	Sez6l2
6.00152e-203	1.27128	0.423	0.21	1.52433e-198	Neurons	Stxbp1
1.86807e-201	1.18783	0.594	0.464	4.7447e-197	Neurons	Anp32e
6.76872e-196	1.58439	0.315	0.102	1.71919e-191	Neurons	Grk1
1.30533e-193	1.45806	0.416	0.207	3.31542e-189	Neurons	Fabp5
4.78343e-191	1.15905	0.513	0.35	1.21494e-186	Neurons	AABR07044711.1
7.23694e-190	1.39006	0.509	0.355	1.83811e-185	Neurons	Ybx3
9.63754e-187	1.64826	0.374	0.179	2.44784e-182	Neurons	Arl4d
5.88111e-186	1.21198	0.368	0.163	1.49374e-181	Neurons	Nsf
5.53915e-182	1.5998	0.393	0.205	1.40689e-177	Neurons	Cers4
1.06857e-178	1.37154	0.28	0.076	2.71406e-174	Neurons	Camk2b
1.41853e-177	-1.74589	0.327	0.491	3.60292e-173	Neurons	Btg2
2.17968e-177	1.16292	0.36	0.159	5.53616e-173	Neurons	Rab3a
1.90762e-175	1.30065	0.431	0.247	4.84516e-171	Neurons	Impdh1
5.6732e-174	1.25392	0.468	0.285	1.44094e-169	Neurons	Acsl6
9.4935e-174	1.65988	0.394	0.219	2.41125e-169	Neurons	Slc31a2
5.87093e-169	1.37312	0.389	0.199	1.49116e-164	Neurons	Reep6
4.68567e-166	1.85073	0.304	0.111	1.19011e-161	Neurons	Ptgds
3.88237e-163	1.08926	0.518	0.399	9.86083e-159	Neurons	Vamp2
1.58731e-162	1.297	0.255	0.067	4.0316e-158	Neurons	Neurod4
2.12412e-162	1.34977	0.444	0.278	5.39505e-158	Neurons	Rdh11
3.67472e-159	1.27414	0.423	0.24	9.33342e-155	Neurons	AA926063
5.97488e-157	1.23894	0.261	0.075	1.51756e-152	Neurons	Cplx3
1.22354e-156	1.05651	0.57	0.467	3.10767e-152	Neurons	Anp32a.1
4.44605e-154	1.45698	0.277	0.093	1.12925e-149	Neurons	Caly
8.44007e-153	1.32116	0.372	0.192	2.14369e-148	Neurons	Ccdc126
4.12361e-152	1.39862	0.382	0.21	1.04736e-147	Neurons	Ip6k2
6.51438e-152	1.08453	0.266	0.082	1.65459e-147	Neurons	Ckmt1
2.51664e-149	1.13726	0.281	0.099	6.39201e-145	Neurons	Zfp365
1.70673e-148	1.37017	0.497	0.361	4.33492e-144	Neurons	Dmd
9.74523e-148	1.26983	0.406	0.241	2.47519e-143	Neurons	Tbcc
5.63731e-143	1.21821	0.256	0.083	1.43182e-138	Neurons	Igsf9
1.67186e-142	1.47468	0.341	0.177	4.24635e-138	Neurons	Stard7
7.59587e-142	1.01965	0.395	0.224	1.92928e-137	Neurons	Bex2
4.95552e-136	1.39709	0.262	0.096	1.25865e-131	Neurons	Pcare
1.48461e-131	1.8265	0.327	0.167	3.77076e-127	Neurons	Gng13
6.12957e-130	1.28987	0.258	0.095	1.55685e-125	Neurons	Rdh12
3.55165e-129	1.24702	0.264	0.102	9.02082e-125	Neurons	Cds1
9.25352e-122	1.19046	0.323	0.165	2.3503e-117	Neurons	Bbs4
1.31458e-121	1.12527	0.427	0.29	3.3389e-117	Neurons	Upf3b
1.92673e-119	1.31315	0.49	0.404	4.89369e-115	Neurons	Hmgb2
5.37597e-119	1.13158	0.3	0.142	1.36544e-114	Neurons	Crocc
6.45693e-114	1.18277	0.284	0.133	1.64e-109	Neurons	Abca4
2.43065e-113	1.18997	0.35	0.205	6.1736e-109	Neurons	Tmem237
1.27645e-112	1.0797	0.365	0.225	3.24206e-108	Neurons	Gls
1.41056e-111	1.17869	0.273	0.125	3.58267e-107	Neurons	Usp2
5.94389e-111	1.26047	0.306	0.161	1.50969e-106	Neurons	Optn
5.49262e-106	1.22398	0.256	0.115	1.39507e-101	Neurons	Mdm1
6.72038e-105	1.13079	0.34	0.198	1.70691e-100	Neurons	Map2
2.13365e-104	1.22629	0.289	0.149	5.41925e-100	Neurons	Icmt
1.02056e-103	1.10952	0.517	0.439	2.59211e-99	Neurons	Tnrc6b
4.30513e-103	1.18481	0.351	0.22	1.09346e-98	Neurons	Fbxl5
2.86351e-102	1.24599	0.369	0.246	7.27302e-98	Neurons	Nfyb
6.27311e-102	1.1559	0.269	0.129	1.59331e-97	Neurons	Herc3
1.44857e-101	1.11021	0.383	0.254	3.67923e-97	Neurons	Cfap36
5.60912e-97	1.13916	0.318	0.186	1.42466e-92	Neurons	Uckl1
6.78978e-96	1.02691	0.383	0.258	1.72454e-91	Neurons	Tusc3
7.1399e-96	1.02783	0.402	0.29	1.81346e-91	Neurons	Tpd52
7.30525e-96	1.35088	0.319	0.197	1.85546e-91	Neurons	Dyrk2
1.72594e-91	1.08782	0.396	0.281	4.38371e-87	Neurons	Smarcd1
2.12386e-90	1.09613	0.294	0.166	5.39438e-86	Neurons	C2cd2l
4.1167e-89	1.22566	0.277	0.153	1.0456e-84	Neurons	Rabgef1
1.74283e-87	1.04461	0.521	0.474	4.42661e-83	Neurons	LOC108349594
8.03257e-81	1.11424	0.404	0.307	2.04019e-76	Neurons	Ankrd12
3.22266e-80	-1.39681	0.681	0.751	8.18523e-76	Neurons	Rtn4
1.95659e-79	1.08074	0.289	0.173	4.96955e-75	Neurons	Rhot2
8.24123e-75	1.1416	0.314	0.21	2.09319e-70	Neurons	Crcp
8.47042e-75	1.09228	0.373	0.278	2.1514e-70	Neurons	Zc3h13
1.02145e-72	1.02347	0.415	0.332	2.59438e-68	Neurons	Lgalsl
4.1211e-70	1.12459	0.422	0.358	1.04672e-65	Neurons	Srsf6
7.39981e-70	1.01087	0.326	0.225	1.87948e-65	Neurons	Ppm1b
8.57382e-69	1.07241	0.32	0.223	2.17766e-64	Neurons	Kif2a
1.54622e-67	1.79315	0.261	0.154	3.92723e-63	Neurons	Pcp4
9.89218e-65	1.17389	0.304	0.215	2.51251e-60	Neurons	Tob2
8.26652e-64	1.07142	0.287	0.189	2.09961e-59	Neurons	Lpcat1
2.44305e-63	1.05213	0.294	0.199	6.20509e-59	Neurons	Gtf2f2
1.61663e-60	1.07409	0.41	0.356	4.10607e-56	Neurons	Acadm
2.07193e-50	1.07211	0.368	0.31	5.26249e-46	Neurons	Utp3
4.03855e-48	1.02702	0.339	0.277	1.02575e-43	Neurons	Adipor1
1.9422e-45	1.01868	0.316	0.25	4.93299e-41	Neurons	Kdm5b
0	5.67436	1	0.14	0	Astrocytes	Apoe
0	5.2479	0.999	0.096	0	Astrocytes	Glul
0	4.87854	0.985	0.055	0	Astrocytes	Gsta1
0	4.62669	0.988	0.044	0	Astrocytes	Cd9
0	4.55167	0.969	0.012	0	Astrocytes	Penk
0	4.54465	0.983	0.032	0	Astrocytes	Kdr
0	4.50468	0.994	0.073	0	Astrocytes	Dkk3
0	4.45357	0.98	0.033	0	Astrocytes	Rlbp1
0	4.44508	0.997	0.23	0	Astrocytes	Clu
0	4.27567	0.976	0.025	0	Astrocytes	Slc1a3
0	3.89277	0.948	0.015	0	Astrocytes	Abca8a
0	3.88014	0.993	0.305	0	Astrocytes	Car2
0	3.8205	0.948	0.039	0	Astrocytes	Ptn
0	3.78582	0.928	0.063	0	Astrocytes	Id3
0	3.71188	0.942	0.014	0	Astrocytes	Gpr37
0	3.60682	0.9	0.027	0	Astrocytes	Il33
0	3.59857	0.942	0.029	0	Astrocytes	Htra1
0	3.57104	0.914	0.009	0	Astrocytes	Rrh
0	3.52166	0.965	0.133	0	Astrocytes	Gpm6a
0	3.43885	0.88	0.016	0	Astrocytes	Frzb
0	3.41951	0.97	0.238	0	Astrocytes	Dbi
0	3.39403	0.952	0.134	0	Astrocytes	Crym
0	3.32942	0.89	0.008	0	Astrocytes	Mlc1
0	3.30709	0.89	0.026	0	Astrocytes	Fxyd1
0	3.30581	0.906	0.058	0	Astrocytes	Hopx
0	3.30569	0.95	0.138	0	Astrocytes	Acsl3
0	3.30557	0.927	0.053	0	Astrocytes	Vim
0	3.22624	0.863	0.008	0	Astrocytes	Aqp4
0	3.17857	0.941	0.179	0	Astrocytes	Sec11c
0	3.14418	0.837	0.005	0	Astrocytes	Efemp1
0	3.08986	0.804	0.006	0	Astrocytes	Sox2
0	3.05602	0.824	0.009	0	Astrocytes	Espn
0	3.05159	0.868	0.03	0	Astrocytes	Ddr1
0	3.04009	0.835	0.03	0	Astrocytes	Cav1
0	3.03677	0.907	0.091	0	Astrocytes	Atp1b3
0	3.01943	0.896	0.108	0	Astrocytes	Sat1
0	3.00849	0.766	0.004	0	Astrocytes	Agt
0	2.9794	0.952	0.161	0	Astrocytes	Ttyh1
0	2.96393	0.764	0.012	0	Astrocytes	Id4
0	2.95719	0.896	0.084	0	Astrocytes	Tgfb2
0	2.88722	0.969	0.075	0	Astrocytes	Sparc
0	2.84148	0.776	0.015	0	Astrocytes	Cryab
0	2.78079	0.756	0.003	0	Astrocytes	Car14
0	2.77819	0.784	0.013	0	Astrocytes	Plpp3
0	2.75852	0.933	0.205	0	Astrocytes	Ctsl
0	2.75226	0.803	0.023	0	Astrocytes	Spon1
0	2.75056	0.716	0.009	0	Astrocytes	LOC100911545
0	2.72084	0.809	0.076	0	Astrocytes	Slmap
0	2.7095	0.741	0.003	0	Astrocytes	Tnfaip6
0	2.70947	0.67	0.004	0	Astrocytes	Hhatl
0	2.69954	0.736	0.006	0	Astrocytes	Slitrk2
0	2.69171	0.771	0.021	0	Astrocytes	Mdk
0	2.6624	0.999	0.676	0	Astrocytes	Rtn4
0	2.63659	0.745	0.022	0	Astrocytes	Cav2
0	2.63059	0.864	0.177	0	Astrocytes	Cox4i2
0	2.59837	0.741	0.007	0	Astrocytes	Lhx2
0	2.59541	0.747	0.027	0	Astrocytes	Rbp1
0	2.55862	0.69	0.042	0	Astrocytes	Mt1
0	2.55054	0.724	0.007	0	Astrocytes	Sox9
0	2.53531	0.786	0.044	0	Astrocytes	Ndrg2
0	2.53223	0.901	0.153	0	Astrocytes	Scd2
0	2.4906	0.923	0.209	0	Astrocytes	Laptm4a
0	2.48151	0.755	0.029	0	Astrocytes	Slc6a1
0	2.45622	0.736	0.036	0	Astrocytes	Pon2
0	2.45403	0.908	0.19	0	Astrocytes	Itm2c
0	2.43226	0.734	0.023	0	Astrocytes	Pla2g16
0	2.41382	0.956	0.285	0	Astrocytes	Cd63
0	2.40259	0.688	0.014	0	Astrocytes	Igf2
0	2.3959	0.673	0.011	0	Astrocytes	Omg
0	2.38646	0.633	0.004	0	Astrocytes	Col9a1
0	2.33393	0.573	0.022	0	Astrocytes	Col11a2
0	2.32928	0.7	0.032	0	Astrocytes	Celsr2
0	2.31914	0.671	0.017	0	Astrocytes	S100b
0	2.30596	0.846	0.112	0	Astrocytes	Cdh2
0	2.27786	0.733	0.09	0	Astrocytes	Mt3
0	2.26446	0.724	0.051	0	Astrocytes	Lsamp
0	2.2613	0.647	0.004	0	Astrocytes	Lgi4
0	2.25699	0.628	0.002	0	Astrocytes	F3
0	2.22084	0.765	0.035	0	Astrocytes	Ctsh
0	2.21669	0.654	0.02	0	Astrocytes	Oaf
0	2.19527	0.593	0.03	0	Astrocytes	Hes1
0	2.18777	0.634	0.013	0	Astrocytes	Rarres2
0	2.18572	0.561	0.018	0	Astrocytes	Id2
0	2.17964	0.657	0.02	0	Astrocytes	Prss23
0	2.17651	0.673	0.034	0	Astrocytes	Cnn3
0	2.16685	0.641	0.023	0	Astrocytes	Gpld1
0	2.15942	0.356	0.007	0	Astrocytes	Dapl1
0	2.14534	0.681	0.057	0	Astrocytes	Nrcam
0	2.13603	0.683	0.062	0	Astrocytes	Six6
0	2.11901	0.845	0.134	0	Astrocytes	Marcks
0	2.09399	0.673	0.038	0	Astrocytes	Crip2
0	2.07113	0.601	0.011	0	Astrocytes	Ptgr1
0	2.06698	0.643	0.025	0	Astrocytes	S100a16
0	2.0599	0.593	0.008	0	Astrocytes	Tril
0	2.04162	0.578	0.008	0	Astrocytes	Ctxn3
0	2.03965	0.734	0.065	0	Astrocytes	Lamp2
0	2.03928	0.991	0.583	0	Astrocytes	Itm2b
0	2.0315	0.58	0.017	0	Astrocytes	Pmp22
0	2.01777	0.809	0.176	0	Astrocytes	Cd81
0	2.00885	0.94	0.321	0	Astrocytes	Psap
0	1.99082	0.617	0.033	0	Astrocytes	Nlgn1
0	1.98213	0.666	0.075	0	Astrocytes	Gsta4
0	1.96658	0.544	0.013	0	Astrocytes	Nkd1
0	1.95937	0.567	0.009	0	Astrocytes	Cmtm5
0	1.95167	0.662	0.063	0	Astrocytes	Hacd2
0	1.92276	0.638	0.06	0	Astrocytes	Qsox1
0	1.91881	0.549	0.011	0	Astrocytes	Pir
0	1.90269	0.92	0.371	0	Astrocytes	Tmem59
0	1.90255	0.794	0.163	0	Astrocytes	Ncam1
0	1.89437	0.922	0.283	0	Astrocytes	Atp1a1
0	1.88431	0.55	0.023	0	Astrocytes	Notch1
0	1.87157	0.82	0.226	0	Astrocytes	Atox1
0	1.85218	0.632	0.072	0	Astrocytes	Ptch1
0	1.84957	0.501	0.005	0	Astrocytes	Mgst1
0	1.8024	0.497	0.004	0	Astrocytes	Olfml3
0	1.79807	0.899	0.147	0	Astrocytes	B2m
0	1.78873	0.486	0.004	0	Astrocytes	Chi3l1
0	1.77701	0.554	0.043	0	Astrocytes	Lrp1
0	1.7741	0.515	0.022	0	Astrocytes	Lipa
0	1.7683	0.95	0.371	0	Astrocytes	Mfge8
0	1.76709	0.622	0.071	0	Astrocytes	Ddah2
0	1.76014	0.493	0.002	0	Astrocytes	Dio1
0	1.74947	0.527	0.024	0	Astrocytes	Vamp1
0	1.74846	0.567	0.032	0	Astrocytes	Rhoc
0	1.74559	0.669	0.084	0	Astrocytes	RGD1565033
0	1.74221	0.763	0.188	0	Astrocytes	Scg3
0	1.73412	0.697	0.118	0	Astrocytes	Rnf13
0	1.7304	0.614	0.075	0	Astrocytes	Nudt4
0	1.72041	0.992	0.543	0	Astrocytes	Mgarp
0	1.71702	0.568	0.052	0	Astrocytes	Minar2
0	1.71584	0.788	0.24	0	Astrocytes	Prdx1
0	1.71541	0.539	0.05	0	Astrocytes	Wscd1
0	1.69217	0.496	0.021	0	Astrocytes	Tox3
0	1.68784	0.583	0.055	0	Astrocytes	Timp2
0	1.68278	0.335	0.004	0	Astrocytes	Postn
0	1.68177	0.507	0.014	0	Astrocytes	Ppp1r1b
0	1.66564	0.718	0.182	0	Astrocytes	Gria2
0	1.66422	0.736	0.143	0	Astrocytes	Gnai2
0	1.66209	0.464	0.003	0	Astrocytes	Mfap2
0	1.65771	0.403	0.031	0	Astrocytes	Cebpd
0	1.65306	0.373	0.005	0	Astrocytes	Mt2A
0	1.62668	0.439	0.005	0	Astrocytes	Sema5a
0	1.6236	0.472	0.015	0	Astrocytes	Trhde
0	1.62185	0.452	0.003	0	Astrocytes	Pdpn
0	1.61111	0.553	0.08	0	Astrocytes	Dner
0	1.60687	0.384	0.004	0	Astrocytes	Cp
0	1.59951	0.586	0.062	0	Astrocytes	LOC108349548
0	1.59713	0.456	0.008	0	Astrocytes	Sfxn5
0	1.59669	0.46	0.033	0	Astrocytes	Zfp36l1
0	1.59657	0.415	0.005	0	Astrocytes	Ngfr
0	1.59594	0.505	0.026	0	Astrocytes	Gpm6b
0	1.58991	0.572	0.171	0	Astrocytes	Pmepa1
0	1.58942	0.849	0.284	0	Astrocytes	Hmgn3
0	1.58589	0.518	0.043	0	Astrocytes	Slc12a2
0	1.58545	0.45	0.031	0	Astrocytes	Ttyh3
0	1.58054	0.416	0.005	0	Astrocytes	Fxyd3
0	1.56946	0.429	0.01	0	Astrocytes	Rassf4
0	1.56763	0.597	0.093	0	Astrocytes	Fez1
0	1.56578	0.778	0.201	0	Astrocytes	Ptprd
0	1.5539	0.516	0.034	0	Astrocytes	Cyba
0	1.54358	0.475	0.016	0	Astrocytes	Psat1
0	1.53555	0.981	0.647	0	Astrocytes	Ckb
0	1.52835	0.418	0.006	0	Astrocytes	Scara3
0	1.52079	0.524	0.065	0	Astrocytes	Ugp2
0	1.5204	0.355	0.001	0	Astrocytes	LOC108351063
0	1.51188	0.327	0.015	0	Astrocytes	Atp1a2
0	1.50919	0.53	0.095	0	Astrocytes	Pak3
0	1.50621	0.524	0.069	0	Astrocytes	Six3
0	1.50468	0.507	0.044	0	Astrocytes	Pax6
0	1.50436	0.464	0.051	0	Astrocytes	Srgap3
0	1.49906	0.497	0.044	0	Astrocytes	Lrrc42
0	1.49642	0.364	0.004	0	Astrocytes	Slc7a3
0	1.49132	0.447	0.027	0	Astrocytes	Gstm1
0	1.48756	0.495	0.037	0	Astrocytes	Fbxo2
0	1.47445	0.524	0.054	0	Astrocytes	Slc27a1
0	1.47124	0.512	0.065	0	Astrocytes	Srebf1
0	1.46455	0.431	0.019	0	Astrocytes	Cd82
0	1.46225	0.48	0.041	0	Astrocytes	Pecr
0	1.45012	0.445	0.035	0	Astrocytes	Cntfr
0	1.44157	0.429	0.016	0	Astrocytes	Wipi1
0	1.43949	0.543	0.072	0	Astrocytes	RT1-CE4
0	1.43577	0.392	0.015	0	Astrocytes	Pcsk1
0	1.42779	0.373	0.005	0	Astrocytes	S1pr3
0	1.42285	0.476	0.062	0	Astrocytes	Prdx6
0	1.4213	0.493	0.036	0	Astrocytes	Clic1
0	1.41739	0.606	0.194	0	Astrocytes	Vegfa
0	1.41666	0.448	0.026	0	Astrocytes	Gpx8
0	1.41101	0.38	0.013	0	Astrocytes	Fxyd7
0	1.40526	0.52	0.072	0	Astrocytes	Mettl7a
0	1.40294	0.418	0.016	0	Astrocytes	Metrn
0	1.40276	0.449	0.06	0	Astrocytes	Ckap4
0	1.40151	0.488	0.052	0	Astrocytes	Tspan6
0	1.40136	0.411	0.03	0	Astrocytes	Rab3b
0	1.40004	0.794	0.292	0	Astrocytes	Dbp
0	1.39808	0.607	0.126	0	Astrocytes	Mesd
0	1.39143	0.577	0.081	0	Astrocytes	Mmd2
0	1.3861	0.348	0.001	0	Astrocytes	Gdpd2
0	1.38545	0.955	0.544	0	Astrocytes	Aldoc
0	1.38273	0.384	0.005	0	Astrocytes	Ush1c
0	1.38178	0.386	0.021	0	Astrocytes	Adgrg1
0	1.38145	0.454	0.043	0	Astrocytes	Fam19a5
0	1.38124	0.501	0.123	0	Astrocytes	Rap1gap
0	1.37981	0.53	0.096	0	Astrocytes	Olfm1
0	1.37555	0.445	0.051	0	Astrocytes	Aldh7a1
0	1.37536	0.405	0.014	0	Astrocytes	Zfp423
0	1.37343	0.747	0.256	0	Astrocytes	Rorb
0	1.36689	0.52	0.077	0	Astrocytes	Lap3
0	1.36144	0.411	0.022	0	Astrocytes	Sapcd1
0	1.35988	0.384	0.003	0	Astrocytes	Phgdh
0	1.35954	0.394	0.009	0	Astrocytes	Gsta6
0	1.35696	0.511	0.097	0	Astrocytes	Mgst3
0	1.35022	0.369	0.002	0	Astrocytes	Cd44
0	1.34443	0.983	0.771	0	Astrocytes	Eno1
0	1.33999	0.345	0.003	0	Astrocytes	AABR07056636.1
0	1.33661	0.35	0.001	0	Astrocytes	Cldn9
0	1.32231	0.37	0.016	0	Astrocytes	Sulf1
0	1.31594	0.366	0.017	0	Astrocytes	Cdk5rap2
0	1.30863	0.377	0.021	0	Astrocytes	Vat1l
0	1.30367	0.333	0.021	0	Astrocytes	Adam11
0	1.30292	0.485	0.074	0	Astrocytes	Hspb11
0	1.2993	0.653	0.165	0	Astrocytes	Hsd17b12
0	1.29871	0.641	0.166	0	Astrocytes	Ptpra
0	1.29663	0.605	0.147	0	Astrocytes	Rcn2
0	1.29524	0.335	0.004	0	Astrocytes	Megf10
0	1.29318	0.597	0.133	0	Astrocytes	Fuca1
0	1.29083	0.559	0.127	0	Astrocytes	Aig1
0	1.28791	0.374	0.023	0	Astrocytes	Neo1
0	1.28743	0.366	0.012	0	Astrocytes	Tst
0	1.28685	0.565	0.124	0	Astrocytes	Gnb2
0	1.28532	0.392	0.036	0	Astrocytes	Samd12
0	1.28514	0.323	0.002	0	Astrocytes	Moxd1
0	1.28312	0.342	0.003	0	Astrocytes	Slc7a11
0	1.27921	0.452	0.073	0	Astrocytes	Prxl2a
0	1.26879	0.335	0.003	0	Astrocytes	Vcam1
0	1.26826	0.364	0.015	0	Astrocytes	Gamt
0	1.26746	0.517	0.147	0	Astrocytes	Dst
0	1.26686	0.374	0.018	0	Astrocytes	Serpinh1
0	1.2668	0.39	0.033	0	Astrocytes	Cd302
0	1.26337	0.655	0.151	0	Astrocytes	Atp6v0e1
0	1.26054	0.375	0.02	0	Astrocytes	Lpar6
0	1.26001	0.341	0.009	0	Astrocytes	Dpy19l3
0	1.25472	0.323	0.004	0	Astrocytes	Akr1c19
0	1.25373	0.36	0.017	0	Astrocytes	Mboat2
0	1.24917	0.349	0.015	0	Astrocytes	Pip5k1b
0	1.24463	0.64	0.181	0	Astrocytes	Arl6ip5
0	1.24314	0.446	0.068	0	Astrocytes	Por
0	1.2431	0.416	0.052	0	Astrocytes	Vgll4
0	1.23959	0.647	0.191	0	Astrocytes	Gdi2
0	1.23531	0.867	0.358	0	Astrocytes	Slc3a2
0	1.23148	0.813	0.344	0	Astrocytes	Selenof
0	1.2297	0.377	0.026	0	Astrocytes	Cdk17
0	1.22222	0.619	0.062	0	Astrocytes	Csrp2
0	1.21737	0.903	0.458	0	Astrocytes	Rtn3
0	1.21651	0.309	0.027	0	Astrocytes	Col16a1
0	1.21525	0.334	0.012	0	Astrocytes	Timp3
0	1.21183	0.3	0.005	0	Astrocytes	Apoc1
0	1.20878	0.335	0.017	0	Astrocytes	Trpm3
0	1.20689	0.448	0.07	0	Astrocytes	Myo6
0	1.19684	0.308	0.004	0	Astrocytes	Car6
0	1.19509	0.398	0.06	0	Astrocytes	AABR07060833.1
0	1.19498	0.503	0.119	0	Astrocytes	Ece1
0	1.19322	0.894	0.45	0	Astrocytes	Tspan3
0	1.19116	0.308	0.006	0	Astrocytes	Notch2
0	1.19004	0.329	0.026	0	Astrocytes	Arhgef40
0	1.18324	0.35	0.039	0	Astrocytes	Fhl1
0	1.1793	0.584	0.139	0	Astrocytes	Lmbrd1
0	1.17732	0.846	0.23	0	Astrocytes	Igfbp7
0	1.1751	0.288	0.003	0	Astrocytes	Gldc
0	1.17267	0.3	0.008	0	Astrocytes	Sema3e
0	1.17184	0.476	0.096	0	Astrocytes	Cdh11
0	1.16952	0.501	0.124	0	Astrocytes	Ddt
0	1.16849	0.267	0.005	0	Astrocytes	Mogat1
0	1.16747	0.485	0.088	0	Astrocytes	Asph
0	1.16453	0.321	0.013	0	Astrocytes	Cpne5
0	1.15701	0.348	0.036	0	Astrocytes	Sema4a
0	1.1559	0.366	0.037	0	Astrocytes	Lrp10
0	1.15252	0.376	0.041	0	Astrocytes	Mgll
0	1.14872	0.349	0.025	0	Astrocytes	Gbe1
0	1.14806	0.407	0.048	0	Astrocytes	Taf13
0	1.14458	0.295	0.004	0	Astrocytes	Mmp14
0	1.14294	0.429	0.081	0	Astrocytes	Vipr2
0	1.13914	0.291	0.004	0	Astrocytes	C1qtnf3
0	1.1345	0.44	0.092	0	Astrocytes	Fgf9
0	1.13432	0.731	0.252	0	Astrocytes	Tubb2a
0	1.1325	0.65	0.176	0	Astrocytes	Selenos
0	1.12865	0.351	0.032	0	Astrocytes	Ccnd3
0	1.12861	0.961	0.652	0	Astrocytes	Tuba1a
0	1.12696	0.274	0.009	0	Astrocytes	Col18a1
0	1.12341	0.269	0.004	0	Astrocytes	Sctr
0	1.1221	0.383	0.046	0	Astrocytes	Nr2f1
0	1.12166	0.499	0.099	0	Astrocytes	Basp1
0	1.11978	0.3	0.003	0	Astrocytes	Mapk4
0	1.11887	0.368	0.029	0	Astrocytes	Fcgrt
0	1.11385	0.415	0.059	0	Astrocytes	Arhgap21
0	1.10729	0.292	0.027	0	Astrocytes	Akap12
0	1.10293	0.309	0.044	0	Astrocytes	Adgrb2
0	1.10265	0.292	0.006	0	Astrocytes	Prelp
0	1.09974	0.621	0.193	0	Astrocytes	Txndc15
0	1.09966	0.335	0.028	0	Astrocytes	Tmem47
0	1.09948	0.3	0.021	0	Astrocytes	RT1-S3
0	1.09608	0.528	0.107	0	Astrocytes	Ctnnbip1
0	1.09466	0.431	0.038	0	Astrocytes	Id1
0	1.09453	0.517	0.113	0	Astrocytes	Sdcbp
0	1.09431	0.383	0.053	0	Astrocytes	2023-09-08
0	1.08973	0.413	0.066	0	Astrocytes	Tm7sf3
0	1.08637	0.47	0.097	0	Astrocytes	Slc20a1
0	1.08357	0.403	0.025	0	Astrocytes	Flt1
0	1.08058	0.378	0.05	0	Astrocytes	Yipf1
0	1.07998	0.402	0.088	0	Astrocytes	Dab2ip
0	1.07772	0.333	0.025	0	Astrocytes	Tns3
0	1.07668	0.44	0.07	0	Astrocytes	Ifi27
0	1.06896	0.661	0.22	0	Astrocytes	Cdkn1b
0	1.06852	0.279	0.01	0	Astrocytes	Adamts1
0	1.06362	0.265	0.001	0	Astrocytes	Egfl6
0	1.06302	0.251	0.001	0	Astrocytes	Slc14a1
0	1.05743	0.279	0.008	0	Astrocytes	Tcf7l2
0	1.05386	0.397	0.074	0	Astrocytes	Gstm2
0	1.04804	0.269	0.002	0	Astrocytes	Cldn23
0	1.0452	0.287	0.011	0	Astrocytes	Nt5dc2
0	1.044	0.272	0.002	0	Astrocytes	Aadat
0	1.04375	0.346	0.042	0	Astrocytes	Hspa2
0	1.03665	0.337	0.051	0	Astrocytes	2023-03-02
0	1.03332	0.435	0.105	0	Astrocytes	Abcd3
0	1.02939	0.288	0.007	0	Astrocytes	Gstt3
0	1.02724	0.323	0.029	0	Astrocytes	Nf1x
0	1.02656	0.251	0.003	0	Astrocytes	Trhr
0	1.02656	0.338	0.033	0	Astrocytes	Sptlc1
0	1.0222	0.443	0.08	0	Astrocytes	Eci1
0	1.01998	0.274	0.015	0	Astrocytes	Plod2
0	1.01924	0.85	0.343	0	Astrocytes	Ftl1
0	1.01847	0.28	0.012	0	Astrocytes	S1pr1
0	1.01685	0.269	0.016	0	Astrocytes	Arvcf
0	1.01587	0.333	0.047	0	Astrocytes	Olfm2
0	1.00633	0.425	0.099	0	Astrocytes	Tcf4
0	1.00482	0.484	0.105	0	Astrocytes	LOC108348064
0	1.00276	0.282	0.011	0	Astrocytes	Fkbp14
0	1.00048	0.444	0.08	0	Astrocytes	Pttg1ip
0	-1.52979	0.82	0.9	0	Astrocytes	Ldha
0	-2.16842	0.773	0.936	0	Astrocytes	Tma7
0	-2.28211	0.649	0.908	0	Astrocytes	Unc119
0	-2.43934	0.858	0.973	0	Astrocytes	Gngt1
0	-2.47808	0.464	0.794	0	Astrocytes	Guca1a
0	-2.5568	0.447	0.809	0	Astrocytes	Rcvrn
0	-2.58324	0.507	0.883	0	Astrocytes	Rom1
0	-2.5951	0.684	0.898	0	Astrocytes	Rho
0	-2.64795	0.366	0.75	0	Astrocytes	Tulp1
0	-2.80372	0.314	0.72	0	Astrocytes	Cnga1
0	-2.86064	0.634	0.881	0	Astrocytes	Pdc
0	-3.01802	0.282	0.724	0	Astrocytes	Hk2
0	-3.20951	0.292	0.734	0	Astrocytes	Rp1
1.14969e-303	1.08054	0.941	0.585	2.9201e-299	Astrocytes	Slc25a4
3.53325e-300	-2.21311	0.48	0.786	8.97411e-296	Astrocytes	Atf4
8.50347e-296	1.11933	0.823	0.402	2.1598e-291	Astrocytes	Scp2
1.53101e-290	-2.47534	0.439	0.77	3.88862e-286	Astrocytes	Sag
3.60982e-286	-2.68337	0.174	0.634	9.16857e-282	Astrocytes	Neurod1
1.53745e-281	-2.34239	0.286	0.688	3.90498e-277	Astrocytes	Aipl1
3.07409e-269	-2.4802	0.208	0.643	7.80789e-265	Astrocytes	Map1b
3.7291e-265	-2.3484	0.382	0.717	9.47153e-261	Astrocytes	Elovl4
4.15033e-262	-1.73273	0.58	0.787	1.05414e-257	Astrocytes	LOC100911295
9.61128e-249	-2.22086	0.491	0.77	2.44117e-244	Astrocytes	Gnat1
1.32112e-248	-2.40884	0.294	0.66	3.35551e-244	Astrocytes	Rtbdn
2.26922e-233	-2.45925	0.198	0.593	5.76358e-229	Astrocytes	Cplx4
1.14412e-230	-2.0534	0.197	0.592	2.90595e-226	Astrocytes	Slc17a7
7.68166e-229	-1.85434	0.584	0.783	1.95106e-224	Astrocytes	LOC100360316
1.22853e-224	-2.30223	0.237	0.609	3.12034e-220	Astrocytes	Fam57b
1.53062e-220	-2.4329	0.237	0.602	3.88761e-216	Astrocytes	Cngb1
1.92732e-209	-2.27422	0.309	0.627	4.8952e-205	Astrocytes	Gnb1
2.95719e-201	-2.35257	0.249	0.584	7.51097e-197	Astrocytes	Guca1b
5.52896e-196	-2.16981	0.156	0.53	1.4043e-191	Astrocytes	Slc6a6
8.82073e-196	-2.09187	0.429	0.679	2.24038e-191	Astrocytes	Pcmtd2
1.37102e-185	-1.6843	0.444	0.683	3.48225e-181	Astrocytes	Pcbp4
6.08937e-182	-1.97326	0.157	0.512	1.54664e-177	Astrocytes	Snap25
1.09976e-174	-2.17463	0.224	0.543	2.79327e-170	Astrocytes	Pde6b
3.49643e-173	-2.14351	0.139	0.489	8.88057e-169	Astrocytes	Lrit1
1.1333e-169	-2.02849	0.185	0.522	2.87846e-165	Astrocytes	Sncb
8.48649e-168	-1.62723	0.99	0.963	2.15548e-163	Astrocytes	Mt-co3
4.1814e-167	-2.02452	0.35	0.609	1.06203e-162	Astrocytes	RGD1597339
5.49238e-163	-2.27339	0.181	0.501	1.39501e-158	Astrocytes	Slc24a1
3.74772e-157	-2.30862	0.124	0.45	9.51882e-153	Astrocytes	Pde6a
1.26428e-156	-1.69744	0.243	0.539	3.21114e-152	Astrocytes	Syt1
1.09718e-155	-1.84542	0.519	0.676	2.78673e-151	Astrocytes	Agpat3
1.59102e-155	-2.05078	0.161	0.483	4.04104e-151	Astrocytes	Osbp2
1.25924e-153	-1.72032	0.179	0.498	3.19835e-149	Astrocytes	Got1
1.13438e-150	-1.22017	0.841	0.828	2.88121e-146	Astrocytes	Ndufa4
8.47304e-149	-2.09002	0.174	0.479	2.15207e-144	Astrocytes	Cabp4
7.15611e-143	-1.67225	0.138	0.452	1.81758e-138	Astrocytes	Atp1a3
1.61597e-142	-2.03891	0.093	0.41	4.10441e-138	Astrocytes	Rd3
9.60385e-136	-1.86758	0.412	0.616	2.43928e-131	Astrocytes	Cited2
2.52631e-135	-1.87242	0.227	0.505	6.41658e-131	Astrocytes	Ybx3
4.86064e-135	-2.14798	0.126	0.422	1.23455e-130	Astrocytes	AABR07068851.1
6.46853e-135	-1.52006	0.36	0.59	1.64294e-130	Astrocytes	Dynll1
2.70269e-133	-2.05726	0.153	0.444	6.86456e-129	Astrocytes	Rgs9
5.17173e-133	-1.99653	0.094	0.396	1.31357e-128	Astrocytes	Ppef2
8.77337e-133	-1.21544	0.66	0.73	2.22835e-128	Astrocytes	Clta
4.11514e-124	-1.988	0.193	0.465	1.0452e-119	Astrocytes	Cep290
6.41915e-120	-1.89516	0.167	0.438	1.6304e-115	Astrocytes	Nxnl2
4.91234e-119	-1.92784	0.159	0.429	1.24769e-114	Astrocytes	Kcnb1
6.23395e-118	-1.68373	0.23	0.484	1.58336e-113	Astrocytes	Arl6
9.5162e-118	-1.4908	0.98	0.946	2.41702e-113	Astrocytes	Mt-co1
1.55639e-116	-1.4764	0.981	0.95	3.95307e-112	Astrocytes	Mt-co2
1.32435e-115	-1.68592	0.149	0.424	3.36371e-111	Astrocytes	Impdh1
2.18907e-113	-1.9697	0.094	0.366	5.56001e-109	Astrocytes	Arl4d
9.97715e-110	-1.3569	0.993	0.962	2.5341e-105	Astrocytes	Mt-atp6
3.44419e-109	-2.3304	0.076	0.339	8.74789e-105	Astrocytes	RGD1560925
2.49126e-108	-1.03925	0.743	0.725	6.32754e-104	Astrocytes	Cox8a
3.37914e-108	-1.85742	0.263	0.49	8.58267e-104	Astrocytes	Hmgb2
7.11222e-107	-1.37534	0.325	0.532	1.80643e-102	Astrocytes	Cpe
2.23102e-104	-1.88221	0.153	0.406	5.66657e-100	Astrocytes	Fabp5
7.51523e-101	-1.45901	0.158	0.412	1.90879e-96	Astrocytes	Stxbp1
1.52579e-99	-1.697	0.108	0.36	3.87534e-95	Astrocytes	Ppp2r2b
6.85471e-99	-1.3803	0.942	0.86	1.74103e-94	Astrocytes	Mt-nd1
1.67791e-98	-1.81453	0.093	0.341	4.26173e-94	Astrocytes	Ankrd33b
2.15071e-98	-1.78531	0.129	0.373	5.46258e-94	Astrocytes	Cdhr1
3.49001e-97	-1.33647	0.383	0.567	8.86428e-93	Astrocytes	Anp32a.1
4.61541e-94	-1.70375	0.178	0.414	1.17227e-89	Astrocytes	AA926063
2.52988e-91	-1.90083	0.163	0.386	6.42563e-87	Astrocytes	Slc31a2
2.83402e-91	-1.66085	0.173	0.404	7.19814e-87	Astrocytes	Rims2
5.26649e-88	-1.6012	0.122	0.35	1.33763e-83	Astrocytes	Tsks
2.95514e-87	-1.73571	0.184	0.399	7.50576e-83	Astrocytes	Cep164
3.10568e-85	-1.0906	0.955	0.878	7.88812e-81	Astrocytes	Mt-nd2
2.4953e-84	-1.27271	0.063	0.288	6.33782e-80	Astrocytes	Sez6l2
5.5421e-84	-1.40714	0.095	0.321	1.40764e-79	Astrocytes	Stmn3
8.80553e-82	-1.40932	0.187	0.399	2.23652e-77	Astrocytes	Tpd52
9.77841e-81	-1.64829	0.15	0.363	2.48362e-76	Astrocytes	Ccdc126
5.97702e-79	-1.2205	0.351	0.519	1.5181e-74	Astrocytes	Guk1
3.90843e-78	-1.64246	0.176	0.379	9.92701e-74	Astrocytes	Reep6
5.79e-78	-1.73493	0.094	0.304	1.4706e-73	Astrocytes	Sgk1
7.98957e-78	-1.6933	0.093	0.303	2.02927e-73	Astrocytes	Grk1
9.90843e-78	-1.38075	0.952	0.87	2.51664e-73	Astrocytes	Mt-nd4
1.06801e-77	-1.28588	0.136	0.349	2.71265e-73	Astrocytes	Rab3a
9.0101e-76	-1.11704	0.778	0.768	2.28848e-71	Astrocytes	Rsrp1
2.46602e-75	-1.24619	0.15	0.357	6.26344e-71	Astrocytes	Nsf
9.86723e-75	-1.21125	0.344	0.504	2.50618e-70	Astrocytes	AABR07044711.1
5.87679e-74	-1.17794	0.408	0.528	1.49265e-69	Astrocytes	Scg5
1.09867e-73	-1.49877	0.064	0.269	2.79052e-69	Astrocytes	Camk2b
1.39286e-73	-1.32974	0.153	0.36	3.53771e-69	Astrocytes	Gls
1.89452e-73	-1.34523	0.515	0.595	4.81189e-69	Astrocytes	Raly
2.38431e-73	-1.89018	0.147	0.349	6.05591e-69	Astrocytes	Hspa1b
2.7565e-73	-1.43651	0.101	0.306	7.00122e-69	Astrocytes	Ptp4a3
6.19231e-72	-1.57952	0.231	0.411	1.57278e-67	Astrocytes	Acadm
8.86526e-72	-1.52162	0.174	0.373	2.25169e-67	Astrocytes	Ip6k2
9.96047e-72	-1.43031	0.085	0.287	2.52986e-67	Astrocytes	Dbndd2
1.43028e-70	-1.88539	0.093	0.293	3.63278e-66	Astrocytes	Ptgds
4.74889e-68	-1.62964	0.204	0.383	1.20617e-63	Astrocytes	Cers4
5.47184e-67	-1.22108	0.064	0.256	1.38979e-62	Astrocytes	Ckmt1
5.60589e-66	-1.12588	0.981	0.932	1.42384e-61	Astrocytes	Mt-cyb
1.81536e-64	-1.45024	0.273	0.435	4.61083e-60	Astrocytes	Rdh11
3.27033e-64	-1.43159	0.072	0.257	8.3063e-60	Astrocytes	Mef2c
1.29004e-61	-1.45603	0.078	0.257	3.27657e-57	Astrocytes	Ndrg1
1.86446e-61	-1.12328	0.493	0.578	4.73554e-57	Astrocytes	Slc25a5
8.15457e-61	-1.12616	0.217	0.395	2.07118e-56	Astrocytes	Zfp385a
8.77667e-60	-1.40183	0.081	0.255	2.22919e-55	Astrocytes	Cds1
1.15113e-59	-1.41182	0.1	0.277	2.92375e-55	Astrocytes	Abca4
1.17972e-59	-1.20587	0.091	0.271	2.99637e-55	Astrocytes	Zfp365
2.9682e-59	-1.37097	0.231	0.397	7.53894e-55	Astrocytes	Tbcc
1.16994e-58	-1.53066	0.164	0.332	2.97154e-54	Astrocytes	Stard7
1.20676e-58	-2.0111	0.146	0.319	3.06506e-54	Astrocytes	Gng13
2.21566e-58	-1.46611	0.09	0.267	5.62755e-54	Astrocytes	Caly
1.55249e-57	-1.31784	0.196	0.37	3.94317e-53	Astrocytes	Zc3h13
1.19734e-56	-1.25396	0.261	0.42	3.04111e-52	Astrocytes	Upf3b
1.6138e-56	-1.18731	0.076	0.25	4.09888e-52	Astrocytes	Cplx3
3.26786e-56	-1.29206	0.413	0.52	8.30004e-52	Astrocytes	LOC108349594
1.26097e-55	-1.36087	0.45	0.539	3.20273e-51	Astrocytes	Mt-nd5
2.76306e-55	-1.20258	0.094	0.269	7.0179e-51	Astrocytes	Hsbp1l1
8.90048e-54	-1.19587	0.565	0.598	2.26063e-49	Astrocytes	Hnrnpf
3.04432e-53	-1.09904	0.526	0.584	7.73226e-49	Astrocytes	Anp32e
3.40852e-53	-1.029	0.42	0.51	8.6573e-49	Astrocytes	Vamp2
1.0628e-52	-1.32612	0.177	0.338	2.69942e-48	Astrocytes	Adipor1
3.75672e-52	-1.09137	0.116	0.284	9.5417e-48	Astrocytes	Got2
1.64371e-50	-1.47984	0.161	0.313	4.17486e-46	Astrocytes	Dyrk2
2.1125e-50	-1.45013	0.098	0.253	5.36555e-46	Astrocytes	Pcare
4.51202e-50	-1.00928	0.521	0.579	1.14601e-45	Astrocytes	Ncl
4.71878e-48	-1.00009	0.182	0.347	1.19852e-43	Astrocytes	Btg2
2.02196e-47	-1.13557	0.454	0.535	5.13557e-43	Astrocytes	Kif1b
4.44347e-47	-1.38028	0.122	0.271	1.1286e-42	Astrocytes	Rabgef1
3.57833e-46	-1.23783	0.164	0.314	9.0886e-42	Astrocytes	Bbs4
1.38662e-45	-1.01662	0.145	0.301	3.52189e-41	Astrocytes	Bin1
3.8983e-45	-1.19187	0.235	0.376	9.90129e-41	Astrocytes	Cfap36
8.40758e-45	-1.2461	0.222	0.363	2.13544e-40	Astrocytes	Nfyb
1.57932e-44	-1.27739	0.169	0.311	4.01133e-40	Astrocytes	Uckl1
3.48195e-42	-1.29353	0.142	0.281	8.84381e-38	Astrocytes	Icmt
4.15855e-42	-1.21141	0.118	0.258	1.05623e-37	Astrocytes	Pacsin2
6.07658e-42	-1.28778	0.237	0.367	1.54339e-37	Astrocytes	Utp3
6.37121e-42	-1.17516	0.146	0.287	1.61822e-37	Astrocytes	C2cd2l
4.18609e-41	-1.16571	0.151	0.291	1.06323e-36	Astrocytes	Crocc
1.04589e-40	-1.22526	0.124	0.261	2.65646e-36	Astrocytes	Herc3
5.05465e-40	-1.08816	0.341	0.449	1.28383e-35	Astrocytes	Rabggtb
9.84224e-40	-1.08718	0.196	0.33	2.49983e-35	Astrocytes	Bzw2
1.65223e-39	-1.06578	0.138	0.278	4.19651e-35	Astrocytes	Mllt6
2.10043e-38	-1.0417	0.493	0.542	5.33487e-34	Astrocytes	Snrpd3
1.09359e-35	-1.2297	0.176	0.297	2.7776e-31	Astrocytes	Optn
2.37231e-35	-1.18354	0.188	0.309	6.02543e-31	Astrocytes	Crcp
1.8779e-34	-1.94308	0.132	0.255	4.76969e-30	Astrocytes	Pcp4
1.09387e-32	-1.13914	0.165	0.283	2.77831e-28	Astrocytes	Rhot2
1.10585e-31	-1.11222	0.202	0.315	2.80875e-27	Astrocytes	Kif2a
1.4099e-31	-1.14413	0.567	0.548	3.58099e-27	Astrocytes	Mt-nd3
1.80351e-31	-1.12415	0.235	0.34	4.58074e-27	Astrocytes	Tmem237
1.81025e-31	-1.12765	0.238	0.343	4.59784e-27	Astrocytes	Fbxl5
4.71053e-30	-1.11096	0.295	0.389	1.19643e-25	Astrocytes	Smarcd1
3.35562e-28	-1.00071	0.255	0.352	8.52294e-24	Astrocytes	Ddit3
1.01856e-27	-1.04116	0.509	0.535	2.58703e-23	Astrocytes	Amd1
6.2797e-27	-1.0704	0.162	0.263	1.59498e-22	Astrocytes	Usp2
4.73975e-24	-1.13647	0.214	0.299	1.20385e-19	Astrocytes	Tob2
3.04076e-23	-1.09232	0.202	0.288	7.72324e-19	Astrocytes	Gtf2f2
1.02997e-19	-1.15629	0.264	0.326	2.61601e-15	Astrocytes	Stmn1
1.33513e-19	-1.04127	0.378	0.417	3.3911e-15	Astrocytes	Srsf6
1.71986e-17	-1.13269	0.216	0.281	4.36828e-13	Astrocytes	Nfkbia
0	6.11382	0.912	0.01	0	Endothelial cells	Cldn5
0	4.84922	0.887	0.04	0	Endothelial cells	Pltp
0	4.48152	0.844	0.063	0	Endothelial cells	Csrp2
0	4.33831	0.864	0.033	0	Endothelial cells	Id1
0	4.21239	0.759	0.013	0	Endothelial cells	Cxcl12
0	4.1592	0.853	0.015	0	Endothelial cells	Ramp2
0	4.02207	0.896	0.14	0	Endothelial cells	Slc2a1
0	3.86946	0.834	0.019	0	Endothelial cells	Flt1
0	3.80388	0.983	0.504	0	Endothelial cells	Tmsb4x
0	3.80097	0.915	0.156	0	Endothelial cells	B2m
0	3.78426	0.824	0.022	0	Endothelial cells	Tm4sf1
0	3.64138	0.724	0.005	0	Endothelial cells	Rgcc
0	3.63393	0.824	0.014	0	Endothelial cells	Plat
0	3.60784	0.817	0.017	0	Endothelial cells	Srgn
0	3.54885	0.812	0.002	0	Endothelial cells	Slco1a4
0	3.54357	0.813	0.023	0	Endothelial cells	Slc9a3r2
0	3.49777	0.828	0.066	0	Endothelial cells	Ifi27
0	3.49738	0.779	0.01	0	Endothelial cells	Itm2a
0	3.43794	0.763	0.015	0	Endothelial cells	Hspb1
0	3.37014	0.86	0.146	0	Endothelial cells	Dusp1
0	3.33953	0.771	0.009	0	Endothelial cells	Vwa1
0	3.30414	0.938	0.611	0	Endothelial cells	Bsg
0	3.26627	0.837	0.123	0	Endothelial cells	Myl12a
0	3.25239	0.602	0.006	0	Endothelial cells	Ccn2
0	3.23468	0.789	0.022	0	Endothelial cells	Tagln2
0	3.1822	0.773	0.004	0	Endothelial cells	Pllp
0	3.16732	0.784	0.017	0	Endothelial cells	Fxyd5
0	3.1587	0.787	0.002	0	Endothelial cells	Adgrf5
0	3.11743	0.844	0.065	0	Endothelial cells	Vim
0	3.02383	0.655	0.024	0	Endothelial cells	Zfp36
0	3.01953	0.767	0.135	0	Endothelial cells	Junb
0	2.99605	0.712	0.019	0	Endothelial cells	Klf4
0	2.98771	0.874	0.237	0	Endothelial cells	Igfbp7
0	2.98667	0.743	0.009	0	Endothelial cells	Slco1c1
0	2.97564	0.738	0.002	0	Endothelial cells	Cavin2
0	2.94198	0.764	0.021	0	Endothelial cells	Cavin3
0	2.91489	0.752	0.016	0	Endothelial cells	Clec2g
0	2.85304	0.846	0.33	0	Endothelial cells	Btg2
0	2.83313	0.714	0.003	0	Endothelial cells	Abcg2
0	2.80572	0.829	0.075	0	Endothelial cells	Id3
0	2.79541	0.747	0.006	0	Endothelial cells	Abcb4
0	2.75877	0.768	0.077	0	Endothelial cells	Cd320
0	2.70636	0.87	0.306	0	Endothelial cells	Tsc22d1
0	2.69499	0.718	0.013	0	Endothelial cells	Lmo2
0	2.67986	0.735	0.005	0	Endothelial cells	Lgals9
0	2.66409	0.74	0.012	0	Endothelial cells	Ahnak
0	2.65608	0.872	0.088	0	Endothelial cells	Sparc
0	2.6106	0.716	0.035	0	Endothelial cells	B3gnt2
0	2.60412	0.445	0.012	0	Endothelial cells	Wfdc1
0	2.60175	0.63	0.001	0	Endothelial cells	Vwf
0	2.58437	0.81	0.233	0	Endothelial cells	Jun
0	2.57596	0.582	0.009	0	Endothelial cells	Apold1
0	2.56299	0.765	0.057	0	Endothelial cells	Esam
0	2.55093	0.804	0.148	0	Endothelial cells	Gnai2
0	2.5176	0.674	0.013	0	Endothelial cells	Ifitm3
0	2.5035	0.689	0.001	0	Endothelial cells	Emcn
0	2.50033	0.634	0.001	0	Endothelial cells	RGD1565166
0	2.49616	0.7	0.001	0	Endothelial cells	Sox17
0	2.48546	0.779	0.088	0	Endothelial cells	Cd99
0	2.46949	0.671	0.001	0	Endothelial cells	Degs2
0	2.4575	0.832	0.215	0	Endothelial cells	Ctsl
0	2.42766	0.496	0.02	0	Endothelial cells	Mgp
0	2.4176	0.779	0.149	0	Endothelial cells	Gstp1
0	2.41232	0.695	0.037	0	Endothelial cells	Cdkn1a
0	2.32412	0.379	0.001	0	Endothelial cells	Depp1
0	2.28459	0.735	0.065	0	Endothelial cells	LOC108349548
0	2.27457	0.66	0.001	0	Endothelial cells	Icam2
0	2.26469	0.834	0.148	0	Endothelial cells	Epas1
0	2.25029	0.798	0.192	0	Endothelial cells	Arl4a
0	2.24355	0.619	0.036	0	Endothelial cells	Hes1
0	2.23967	0.959	0.656	0	Endothelial cells	Fth1
0	2.22855	0.71	0.069	0	Endothelial cells	Nsg1
0	2.22116	0.524	0.059	0	Endothelial cells	Ptn
0	2.21101	0.679	0.013	0	Endothelial cells	Cavin1
0	2.20684	0.612	0.004	0	Endothelial cells	Pmaip1
0	2.20147	0.623	0.005	0	Endothelial cells	Sult1a1
0	2.20082	0.621	0.001	0	Endothelial cells	Cyyr1
0	2.18485	0.671	0.018	0	Endothelial cells	Mpzl1
0	2.1788	0.629	0.005	0	Endothelial cells	Slfn5
0	2.16903	0.68	0.041	0	Endothelial cells	Tpm1
0	2.13858	0.578	0.005	0	Endothelial cells	RT1-T24-3
0	2.1344	0.584	0.002	0	Endothelial cells	Angptl4
0	2.1293	0.866	0.266	0	Endothelial cells	Nfkbia
0	2.09867	0.595	0.001	0	Endothelial cells	Akr1c15
0	2.09408	0.676	0.021	0	Endothelial cells	Arpc1b
0	2.08345	0.662	0.04	0	Endothelial cells	Parvb
0	2.07744	0.613	0.004	0	Endothelial cells	Fam110d
0	2.07445	0.629	0.002	0	Endothelial cells	Egfl7
0	2.06993	0.571	0.003	0	Endothelial cells	Fn1
0	2.06865	0.698	0.092	0	Endothelial cells	Acer2
0	2.04518	0.626	0.01	0	Endothelial cells	Tinagl1
0	2.02453	0.788	0.255	0	Endothelial cells	Ldhb
0	2.02219	0.813	0.209	0	Endothelial cells	App
0	1.99901	0.61	0.034	0	Endothelial cells	Zfp36l1
0	1.99899	0.653	0.027	0	Endothelial cells	Fcgrt
0	1.99128	0.704	0.143	0	Endothelial cells	Tsc22d3
0	1.98748	0.665	0.018	0	Endothelial cells	Rasip1
0	1.98132	0.786	0.276	0	Endothelial cells	Jund
0	1.97502	0.688	0.045	0	Endothelial cells	Crip2
0	1.96989	0.579	0.08	0	Endothelial cells	Ier3
0	1.93823	0.669	0.064	0	Endothelial cells	Sh3bgrl3
0	1.9325	0.606	0.006	0	Endothelial cells	Eng
0	1.93015	0.893	0.452	0	Endothelial cells	Rps28
0	1.92775	0.64	0.044	0	Endothelial cells	Slc39a10
0	1.92685	0.609	0.014	0	Endothelial cells	Bcam
0	1.92303	0.608	0.021	0	Endothelial cells	Rras
0	1.92096	0.529	0.011	0	Endothelial cells	RT1-T24-4
0	1.91801	0.611	0.005	0	Endothelial cells	Cmtm8
0	1.89432	0.624	0.036	0	Endothelial cells	Gpcpd1
0	1.87532	0.654	0.032	0	Endothelial cells	S100a16
0	1.8667	0.941	0.645	0	Endothelial cells	Rpl37a
0	1.86513	0.472	0.052	0	Endothelial cells	Nr4a1
0	1.86113	0.702	0.087	0	Endothelial cells	Bcl2l1
0	1.85857	0.565	0.016	0	Endothelial cells	Ptprr
0	1.8551	0.627	0.066	0	Endothelial cells	Dipk1b
0	1.85244	0.717	0.027	0	Endothelial cells	Anxa3
0	1.84471	0.622	0.15	0	Endothelial cells	Egr1
0	1.83266	0.606	0.015	0	Endothelial cells	Ifitm2
0	1.82755	0.477	0.034	0	Endothelial cells	Cebpd
0	1.82489	0.72	0.113	0	Endothelial cells	Sdcbp
0	1.82268	0.573	0.002	0	Endothelial cells	Maob
0	1.81879	0.367	0.038	0	Endothelial cells	Fosb
0	1.80839	0.565	0.001	0	Endothelial cells	Nostrin
0	1.80254	0.702	0.133	0	Endothelial cells	Psme1
0	1.79968	0.564	0.004	0	Endothelial cells	Anxa2
0	1.79767	0.57	0.059	0	Endothelial cells	Rhob
0	1.7916	0.57	0.001	0	Endothelial cells	RGD1310587
0	1.78829	0.585	0.01	0	Endothelial cells	Col4a1
0	1.7825	0.955	0.684	0	Endothelial cells	Tpt1
0	1.78247	0.572	0.017	0	Endothelial cells	Gatm
0	1.78188	0.562	0.001	0	Endothelial cells	Fam107a
0	1.77286	0.917	0.592	0	Endothelial cells	Rps27
0	1.76389	0.646	0.047	0	Endothelial cells	Ucp2
0	1.75876	0.551	0	0	Endothelial cells	Ptprb
0	1.75474	0.531	0	0	Endothelial cells	Sox18
0	1.75192	0.854	0.385	0	Endothelial cells	Rps5
0	1.7436	0.921	0.58	0	Endothelial cells	Rps16
0	1.74225	0.841	0.365	0	Endothelial cells	Slc3a2
0	1.74198	0.545	0.001	0	Endothelial cells	Tek
0	1.74166	0.542	0.027	0	Endothelial cells	Txnip
0	1.70952	0.56	0.019	0	Endothelial cells	RT1-S3
0	1.70645	0.863	0.231	0	Endothelial cells	LOC100364435
0	1.70614	0.393	0.002	0	Endothelial cells	Ccn1
0	1.70318	0.709	0.061	0	Endothelial cells	Cd9
0	1.70303	0.529	0	0	Endothelial cells	Adgrl4
0	1.69395	0.892	0.443	0	Endothelial cells	Myl6
0	1.68323	0.553	0.019	0	Endothelial cells	Slc7a1
0	1.68242	0.689	0.161	0	Endothelial cells	Selenom
0	1.68195	0.598	0.027	0	Endothelial cells	Cd48
0	1.66715	0.529	0	0	Endothelial cells	Paqr5
0	1.66484	0.917	0.568	0	Endothelial cells	Rpl38
0	1.66217	0.547	0	0	Endothelial cells	Cdh5
0	1.65198	0.503	0.001	0	Endothelial cells	Mfsd2a
0	1.65054	0.598	0.038	0	Endothelial cells	Rhoc
0	1.65046	0.914	0.152	0	Endothelial cells	Apoe
0	1.63759	0.506	0.001	0	Endothelial cells	Upp1
0	1.63299	0.926	0.599	0	Endothelial cells	Rps23
0	1.63196	0.87	0.436	0	Endothelial cells	Rps12
0	1.62456	0.527	0.003	0	Endothelial cells	Tie1
0	1.61924	0.536	0.021	0	Endothelial cells	Utrn
0	1.59867	0.691	0.137	0	Endothelial cells	Txn1
0	1.59814	0.564	0.018	0	Endothelial cells	Anxa5
0	1.59767	0.541	0.007	0	Endothelial cells	Kank3
0	1.5922	0.567	0.035	0	Endothelial cells	Cd200
0	1.56549	0.951	0.661	0	Endothelial cells	Rplp1
0	1.56516	0.543	0.018	0	Endothelial cells	Rnf144b
0	1.56477	0.913	0.581	0	Endothelial cells	Rpl27a
0	1.55841	0.569	0.025	0	Endothelial cells	Msn
0	1.54283	0.55	0.029	0	Endothelial cells	Notch1
0	1.54233	0.484	0.004	0	Endothelial cells	Capg
0	1.54134	0.518	0.004	0	Endothelial cells	Pdgfb
0	1.54039	0.447	0.001	0	Endothelial cells	Tmem252
0	1.53754	0.492	0.008	0	Endothelial cells	Lmcd1
0	1.52458	0.646	0.094	0	Endothelial cells	AABR07007032.1
0	1.52359	0.944	0.689	0	Endothelial cells	LOC100359583
0	1.51541	0.73	0.158	0	Endothelial cells	Gas6
0	1.51513	0.493	0.005	0	Endothelial cells	Slfn2
0	1.51077	0.509	0.008	0	Endothelial cells	Tspan8
0	1.50641	0.508	0.007	0	Endothelial cells	Tmem140
0	1.50365	0.947	0.674	0	Endothelial cells	Fau
0	1.50158	0.479	0.011	0	Endothelial cells	S1pr1
0	1.49772	0.497	0.001	0	Endothelial cells	Mmrn2
0	1.49224	0.664	0.127	0	Endothelial cells	Gnb2
0	1.48872	0.932	0.618	0	Endothelial cells	Rps14
0	1.48807	0.467	0.012	0	Endothelial cells	Uaca
0	1.48751	0.689	0.177	0	Endothelial cells	Nme2
0	1.48715	0.499	0.003	0	Endothelial cells	Ocln
0	1.48418	0.555	0.043	0	Endothelial cells	Itgb1
0	1.47691	0.498	0.001	0	Endothelial cells	Lef1
0	1.46994	0.471	0.01	0	Endothelial cells	Ecm1
0	1.4614	0.586	0.107	0	Endothelial cells	Sptbn1
0	1.46086	0.461	0.001	0	Endothelial cells	Apol3
0	1.45839	0.503	0.019	0	Endothelial cells	Serpinb6a
0	1.45383	0.502	0.001	0	Endothelial cells	Ctla2a
0	1.45354	0.478	0.012	0	Endothelial cells	Itga6
0	1.44497	0.924	0.602	0	Endothelial cells	Rpl35
0	1.43866	0.916	0.579	0	Endothelial cells	Rpl36
0	1.43724	0.639	0.114	0	Endothelial cells	Ech1
0	1.43662	0.45	0.007	0	Endothelial cells	Nrgn
0	1.43564	0.489	0.003	0	Endothelial cells	Grasp
0	1.43417	0.394	0.004	0	Endothelial cells	LOC684871
0	1.42985	0.612	0.122	0	Endothelial cells	Ppp1r15a
0	1.42119	0.452	0.001	0	Endothelial cells	Lims2
0	1.41972	0.472	0.001	0	Endothelial cells	Clec14a
0	1.41681	0.645	0.046	0	Endothelial cells	Tmem176b
0	1.41021	0.528	0.027	0	Endothelial cells	Dhrs3
0	1.40413	0.473	0.008	0	Endothelial cells	Ets1
0	1.39108	0.593	0.109	0	Endothelial cells	Slc7a5
0	1.38974	0.569	0.077	0	Endothelial cells	RT1-CE4
0	1.38522	0.469	0.017	0	Endothelial cells	Lamb2
0	1.37461	0.534	0.064	0	Endothelial cells	Mtus1
0	1.36906	0.486	0.062	0	Endothelial cells	Ier5
0	1.36481	0.566	0.038	0	Endothelial cells	Cyba
0	1.35468	0.71	0.191	0	Endothelial cells	Rhoa
0	1.35321	0.961	0.767	0	Endothelial cells	Rpl41
0	1.3469	0.478	0.003	0	Endothelial cells	Thsd1
0	1.34401	0.463	0.007	0	Endothelial cells	Kitlg
0	1.34169	0.478	0.021	0	Endothelial cells	Isyna1
0	1.34077	0.451	0.003	0	Endothelial cells	Serpinb9
0	1.33354	0.526	0.097	0	Endothelial cells	Sertad1
0	1.33221	0.463	0.007	0	Endothelial cells	Foxc1
0	1.32585	0.656	0.152	0	Endothelial cells	Rexo2
0	1.31277	0.455	0.005	0	Endothelial cells	Tdrp
0	1.31129	0.499	0.042	0	Endothelial cells	Mgll
0	1.31085	0.46	0.006	0	Endothelial cells	Tmem204
0	1.30854	0.448	0	0	Endothelial cells	Adtrp
0	1.30328	0.537	0.04	0	Endothelial cells	Clic1
0	1.30233	0.483	0.094	0	Endothelial cells	Phlda1
0	1.28961	0.366	0.001	0	Endothelial cells	Tnfrsf11b
0	1.28559	0.415	0	0	Endothelial cells	Gata2
0	1.2844	0.692	0.186	0	Endothelial cells	Cd81
0	1.28382	0.479	0.007	0	Endothelial cells	F11r
0	1.28224	0.726	0.222	0	Endothelial cells	Laptm4a
0	1.28061	0.468	0.053	0	Endothelial cells	Lmna
0	1.28039	0.526	0.085	0	Endothelial cells	Gsta4
0	1.27323	0.47	0.03	0	Endothelial cells	Klf3
0	1.27256	0.57	0.088	0	Endothelial cells	Dab2ip
0	1.26765	0.482	0.023	0	Endothelial cells	Arhgdib
0	1.2676	0.59	0.079	0	Endothelial cells	Tspan5
0	1.2669	0.568	0.1	0	Endothelial cells	Tcf4
0	1.25795	0.601	0.114	0	Endothelial cells	2023-03-02
0	1.25354	0.421	0.007	0	Endothelial cells	Myrip
0	1.25293	0.433	0.005	0	Endothelial cells	St3gal6
0	1.24026	0.603	0.108	0	Endothelial cells	Fermt2
0	1.23931	0.351	0.023	0	Endothelial cells	Crip1
0	1.23894	0.462	0.038	0	Endothelial cells	Ehd4
0	1.23843	0.423	0.004	0	Endothelial cells	Acvrl1
0	1.23603	0.443	0	0	Endothelial cells	Erg
0	1.23294	0.543	0.049	0	Endothelial cells	Pon2
0	1.23074	0.551	0.086	0	Endothelial cells	Npdc1
0	1.2241	0.497	0.083	0	Endothelial cells	Sparcl1
0	1.22029	0.488	0.032	0	Endothelial cells	Gltp
0	1.20687	0.35	0.004	0	Endothelial cells	Thbd
0	1.20371	0.538	0.046	0	Endothelial cells	Cav1
0	1.20113	0.428	0.009	0	Endothelial cells	Nos3
0	1.1997	0.382	0	0	Endothelial cells	Dll4
0	1.19193	0.42	0.015	0	Endothelial cells	Pls3
0	1.19002	0.611	0.123	0	Endothelial cells	Rac1
0	1.18475	0.372	0.022	0	Endothelial cells	Ier5l
0	1.17976	0.392	0.02	0	Endothelial cells	Nrarp
0	1.17094	0.612	0.128	0	Endothelial cells	Rab11a
0	1.16835	0.418	0.01	0	Endothelial cells	Maoa
0	1.16548	0.386	0.017	0	Endothelial cells	Dusp6
0	1.16543	0.405	0.008	0	Endothelial cells	Cgnl1
0	1.16321	0.296	0.001	0	Endothelial cells	Mal
0	1.15799	0.359	0	0	Endothelial cells	Notum
0	1.15416	0.451	0.027	0	Endothelial cells	Lsr
0	1.1476	0.284	0.001	0	Endothelial cells	Lrg1
0	1.1442	0.408	0.005	0	Endothelial cells	Olfml2a
0	1.14102	0.567	0.105	0	Endothelial cells	Arhgdia
0	1.12418	0.387	0.004	0	Endothelial cells	Ppfibp1
0	1.1159	0.389	0.055	0	Endothelial cells	Plk2
0	1.11051	0.26	0.01	0	Endothelial cells	Ch25h
0	1.10667	0.558	0.129	0	Endothelial cells	Tspan13
0	1.10532	0.395	0.004	0	Endothelial cells	Trim47
0	1.10124	0.37	0.005	0	Endothelial cells	S100a11
0	1.10057	0.408	0.018	0	Endothelial cells	Cast
0	1.0976	0.426	0.033	0	Endothelial cells	Smad7
0	1.09597	0.579	0.11	0	Endothelial cells	Tpm3
0	1.09573	0.507	0.056	0	Endothelial cells	Tln1
0	1.09181	0.253	0.002	0	Endothelial cells	Igfbp3
0	1.08588	0.445	0.035	0	Endothelial cells	Dock9
0	1.08378	0.477	0.032	0	Endothelial cells	Csrp1
0	1.0806	0.508	0.083	0	Endothelial cells	Gpx1
0	1.07874	0.388	0.016	0	Endothelial cells	Tpm4
0	1.07699	0.347	0	0	Endothelial cells	Mecom
0	1.07397	0.528	0.082	0	Endothelial cells	Eci1
0	1.07021	0.679	0.141	0	Endothelial cells	Podxl
0	1.0699	0.378	0.012	0	Endothelial cells	Pcdh19
0	1.06691	0.407	0.009	0	Endothelial cells	Rbms1
0	1.06521	0.322	0.001	0	Endothelial cells	Hmcn1
0	1.06104	0.364	0	0	Endothelial cells	AABR07044570.2
0	1.05753	0.429	0.025	0	Endothelial cells	Sh3bp5
0	1.0536	0.61	0.146	0	Endothelial cells	Jam2
0	1.05134	0.414	0.02	0	Endothelial cells	Arhgap29
0	1.05097	0.453	0.035	0	Endothelial cells	Reep3
0	1.0506	0.456	0.045	0	Endothelial cells	Wbp1l
0	1.04977	0.57	0.109	0	Endothelial cells	Tjp1
0	1.04918	0.371	0.001	0	Endothelial cells	Ushbp1
0	1.04722	0.505	0.082	0	Endothelial cells	Lap3
0	1.04664	0.429	0.025	0	Endothelial cells	Eva1b
0	1.04581	0.414	0.021	0	Endothelial cells	Serpinh1
0	1.04534	0.441	0.038	0	Endothelial cells	Adam10
0	1.04365	0.469	0.042	0	Endothelial cells	Tmod3
0	1.04291	0.356	0.005	0	Endothelial cells	Apcdd1
0	1.04044	0.663	0.157	0	Endothelial cells	Atp6v0e1
0	1.03954	0.389	0.022	0	Endothelial cells	Vat1
0	1.03918	0.37	0.005	0	Endothelial cells	Akap2
0	1.03865	0.556	0.068	0	Endothelial cells	Ifngr1
0	1.03227	0.535	0.082	0	Endothelial cells	Hip1
0	1.02883	0.355	0	0	Endothelial cells	Hspa12b
0	1.02457	0.417	0.033	0	Endothelial cells	Prss23
0	1.02316	0.549	0.1	0	Endothelial cells	Agfg1
0	1.02302	0.388	0.022	0	Endothelial cells	Lipe
0	1.01214	0.368	0.007	0	Endothelial cells	Elk3
0	1.01022	0.386	0.033	0	Endothelial cells	Hyal2
0	1.00826	0.423	0.038	0	Endothelial cells	Flnb
0	1.00476	0.376	0.008	0	Endothelial cells	Psmb9
0	1.00113	0.414	0.035	0	Endothelial cells	Klf13
1.539e-306	1.29233	0.714	0.219	3.90892e-302	Endothelial cells	Cd59
3.79621e-306	1.46637	0.917	0.589	9.642e-302	Endothelial cells	Itm2b
2.27327e-305	1.32632	0.942	0.658	5.77388e-301	Endothelial cells	Uba52
2.69215e-305	2.55015	0.612	0.176	6.83779e-301	Endothelial cells	Fos
1.50926e-304	1.37761	0.732	0.247	3.83337e-300	Endothelial cells	Cstb
1.08193e-301	1.51812	0.836	0.375	2.74798e-297	Endothelial cells	Rpl22
7.65785e-297	1.52228	0.9	0.563	1.94502e-292	Endothelial cells	Rps18l1
6.21179e-295	1.4738	0.785	0.297	1.57773e-290	Endothelial cells	Actb
3.46993e-287	1.54174	0.876	0.505	8.81328e-283	Endothelial cells	Rps4x
1.30657e-286	1.06643	0.54	0.129	3.31856e-282	Endothelial cells	Ly6e
1.19645e-283	1.30167	0.937	0.685	3.03886e-279	Endothelial cells	LOC108350501
1.48982e-283	1.37479	0.764	0.291	3.78399e-279	Endothelial cells	Rpl36al
2.00657e-282	1.26777	0.927	0.592	5.09648e-278	Endothelial cells	Calm2
2.1251e-278	1.49291	0.796	0.334	5.39755e-274	Endothelial cells	LOC100360781
7.68189e-277	1.42053	0.876	0.481	1.95112e-272	Endothelial cells	Rps11
1.5212e-275	1.38237	0.887	0.518	3.86371e-271	Endothelial cells	Rpl11
4.06466e-275	1.42332	0.873	0.488	1.03238e-270	Endothelial cells	Rps20
3.20426e-267	1.24814	0.521	0.125	8.13849e-263	Endothelial cells	Sat1
2.44598e-259	1.22449	0.918	0.629	6.21255e-255	Endothelial cells	Rpl13
1.91852e-257	1.21047	0.927	0.642	4.87286e-253	Endothelial cells	Rps27a.1
1.4094e-256	1.33599	0.873	0.522	3.57973e-252	Endothelial cells	Rpl29
6.01388e-253	1.2472	0.745	0.281	1.52747e-248	Endothelial cells	Myl12b
1.0902e-250	1.09299	0.705	0.236	2.76901e-246	Endothelial cells	Atox1
4.90554e-250	1.29113	0.888	0.53	1.24596e-245	Endothelial cells	Rpsa
1.0981e-246	1.12164	0.694	0.235	2.78906e-242	Endothelial cells	AC141489.1
7.31008e-246	1.24451	0.903	0.612	1.85669e-241	Endothelial cells	Rpl34
2.40393e-243	1.07266	0.961	0.792	6.10573e-239	Endothelial cells	Rps8
2.81978e-243	1.37463	0.849	0.48	7.16195e-239	Endothelial cells	LOC100360841
3.89727e-239	1.25322	0.889	0.541	9.89869e-235	Endothelial cells	Rpl18a
4.37485e-237	1.0365	0.616	0.191	1.11117e-232	Endothelial cells	Rps10
2.29957e-235	1.29822	0.853	0.446	5.84069e-231	Endothelial cells	Rps21
1.35872e-228	1.20978	0.871	0.518	3.45101e-224	Endothelial cells	Rpl28
6.10696e-225	1.12666	0.928	0.656	1.55111e-220	Endothelial cells	Rps15a
9.60712e-225	1.0758	0.718	0.24	2.44011e-220	Endothelial cells	Ndrg1
3.77089e-223	1.121	0.9	0.604	9.5777e-219	Endothelial cells	Rpl14
2.40767e-221	1.05268	0.741	0.29	6.11523e-217	Endothelial cells	Ppib
5.01355e-219	1.11454	0.723	0.283	1.27339e-214	Endothelial cells	Rpl32
2.36105e-217	1.14545	0.82	0.396	5.99683e-213	Endothelial cells	Rps17
1.21998e-215	1.0038	0.682	0.243	3.09862e-211	Endothelial cells	Ppdpf
3.18731e-215	1.12536	0.894	0.547	8.09544e-211	Endothelial cells	Rps15
5.80768e-213	1.16953	0.894	0.604	1.47509e-208	Endothelial cells	Rps3a
1.25035e-212	1.17461	0.895	0.572	3.17576e-208	Endothelial cells	Hsp90ab1
1.9658e-212	1.20713	0.818	0.427	4.99294e-208	Endothelial cells	Rps9
6.42948e-212	1.63934	0.44	0.112	1.63302e-207	Endothelial cells	Atf3
6.38028e-210	1.14894	0.874	0.509	1.62053e-205	Endothelial cells	Rps24
4.58683e-209	-1.58577	0.648	0.905	1.16501e-204	Endothelial cells	Unc119
6.74651e-208	1.0001	0.941	0.714	1.71355e-203	Endothelial cells	LOC100360449
2.32713e-204	1.27786	0.605	0.202	5.91067e-200	Endothelial cells	Gadd45b
1.28926e-201	1.11144	0.882	0.552	3.27459e-197	Endothelial cells	Rps3
1.16004e-199	1.14046	0.688	0.264	2.94639e-195	Endothelial cells	Rps19
8.59268e-199	1.0645	0.898	0.656	2.18246e-194	Endothelial cells	Rps2
6.74154e-198	-1.37751	0.823	0.899	1.71228e-193	Endothelial cells	Ldha
7.48284e-196	1.14636	0.847	0.476	1.90057e-191	Endothelial cells	LOC100361854
2.60377e-192	1.07944	0.771	0.347	6.61332e-188	Endothelial cells	Map1lc3a
2.87664e-191	1.09535	0.881	0.573	7.30638e-187	Endothelial cells	Rpl7
2.07831e-190	1.31605	0.887	0.593	5.2787e-186	Endothelial cells	Ubc
1.32042e-180	1.05315	0.845	0.504	3.35373e-176	Endothelial cells	Rps10l1
9.38384e-177	1.04749	0.855	0.508	2.3834e-172	Endothelial cells	Rpl18
1.82059e-174	1.01165	0.904	0.599	4.62412e-170	Endothelial cells	Actg1
2.43637e-174	1.03815	0.779	0.395	6.18814e-170	Endothelial cells	Rpl12
3.30914e-163	-2.33328	0.408	0.716	8.40488e-159	Endothelial cells	Hk2
4.91774e-158	-2.29713	0.438	0.725	1.24906e-153	Endothelial cells	Rp1
8.595e-158	1.04695	0.449	0.14	2.18304e-153	Endothelial cells	Mrps26
2.15615e-149	-1.39713	0.848	0.834	5.47641e-145	Endothelial cells	LOC108351137.1
1.98351e-142	-1.84913	0.403	0.712	5.03791e-138	Endothelial cells	Elovl4
2.38968e-142	-1.43525	0.697	0.875	6.06954e-138	Endothelial cells	Rom1
2.20059e-138	-2.00926	0.26	0.626	5.58927e-134	Endothelial cells	Neurod1
2.93241e-132	-1.63262	0.82	0.873	7.44803e-128	Endothelial cells	Pdc
1.33936e-131	-1.84233	0.454	0.712	3.40183e-127	Endothelial cells	Cnga1
6.70542e-131	-1.70531	0.492	0.743	1.70311e-126	Endothelial cells	Tulp1
1.36865e-117	-1.49493	0.628	0.787	3.47622e-113	Endothelial cells	Guca1a
3.80483e-117	-1.62232	0.415	0.681	9.66389e-113	Endothelial cells	Aipl1
1.95052e-113	-1.26369	0.774	0.778	4.95413e-109	Endothelial cells	Eno1
4.50296e-111	-1.08383	0.902	0.931	1.14371e-106	Endothelial cells	Tma7
8.2826e-111	-1.87796	0.277	0.587	2.1037e-106	Endothelial cells	Cplx4
1.17694e-107	-1.37229	0.669	0.8	2.98931e-103	Endothelial cells	Rcvrn
1.75115e-106	-1.59611	0.438	0.676	4.44776e-102	Endothelial cells	Agpat3
7.84038e-105	-1.04196	0.94	0.969	1.99138e-100	Endothelial cells	Gngt1
1.10152e-103	-1.35867	0.444	0.68	2.79776e-99	Endothelial cells	Pcbp4
1.40057e-103	-1.16617	0.69	0.782	3.55731e-99	Endothelial cells	LOC100911295
2.66758e-103	-1.75152	0.489	0.675	6.7754e-99	Endothelial cells	Pcmtd2
5.17549e-102	-1.58716	0.224	0.536	1.31452e-97	Endothelial cells	Syt1
1.89127e-101	-1.61498	0.253	0.555	4.80364e-97	Endothelial cells	Hist3h2ba
4.08242e-100	-1.30258	0.864	0.892	1.03689e-95	Endothelial cells	Rho
7.61218e-100	-1.50825	0.309	0.585	1.93342e-95	Endothelial cells	Slc17a7
2.12984e-94	-1.26308	0.669	0.779	5.40958e-90	Endothelial cells	LOC100360316
1.24639e-93	-1.6149	0.399	0.634	3.1657e-89	Endothelial cells	Map1b
2.8692e-91	-2.03373	0.316	0.563	7.28749e-87	Endothelial cells	Mgarp
1.44229e-88	-1.91032	0.206	0.491	3.66326e-84	Endothelial cells	Dmd
1.24126e-86	-1.37424	0.331	0.579	3.15268e-82	Endothelial cells	Atp1b2
2.27358e-86	-1.47918	0.349	0.603	5.77467e-82	Endothelial cells	Fam57b
5.62956e-86	-1.56415	0.23	0.506	1.42985e-81	Endothelial cells	Snap25
2.15616e-85	-1.30918	0.645	0.761	5.47642e-81	Endothelial cells	Sag
4.17364e-85	-1.66655	0.197	0.484	1.06006e-80	Endothelial cells	Lrit1
1.06758e-84	-1.7135	0.252	0.516	2.71154e-80	Endothelial cells	Sncb
2.90136e-81	-1.64733	0.358	0.578	7.36917e-77	Endothelial cells	Guca1b
1.43498e-79	-1.45775	0.483	0.651	3.6447e-75	Endothelial cells	Rtbdn
4.3275e-79	-1.32662	0.268	0.53	1.09914e-74	Endothelial cells	Scg5
5.45216e-73	-1.64814	0.131	0.403	1.38479e-68	Endothelial cells	Rims2
3.59011e-72	-1.3174	0.478	0.615	9.11852e-68	Endothelial cells	Prnp
1.49885e-70	-1.4762	0.409	0.594	3.80693e-66	Endothelial cells	Cngb1
1.7848e-69	-1.40993	0.198	0.458	4.53322e-65	Endothelial cells	Acsl6
3.4256e-69	-1.56665	0.235	0.478	8.70068e-65	Endothelial cells	Osbp2
1.19005e-68	-1.33901	0.389	0.561	3.0226e-64	Endothelial cells	Aldoc
1.79785e-67	-1.61056	0.151	0.405	4.56636e-63	Endothelial cells	Rd3
3.44387e-66	1.0329	0.612	0.336	8.74707e-62	Endothelial cells	Hspa1b
1.7065e-64	-1.57619	0.489	0.612	4.33434e-60	Endothelial cells	Cited2
3.42428e-64	-1.65732	0.289	0.494	8.69733e-60	Endothelial cells	Slc24a1
7.39808e-64	-1.30688	0.281	0.492	1.87904e-59	Endothelial cells	Got1
9.23997e-62	-1.64962	0.244	0.46	2.34686e-57	Endothelial cells	Cep290
2.12742e-60	-1.36902	0.35	0.537	5.40344e-56	Endothelial cells	Pde6b
1.22957e-57	-1.34807	0.273	0.48	3.12298e-53	Endothelial cells	Arl6
2.1486e-57	-1.36881	0.498	0.602	5.45723e-53	Endothelial cells	RGD1597339
2.08307e-56	-1.15752	0.151	0.385	5.2908e-52	Endothelial cells	Bex2
2.39772e-56	-1.40564	0.673	0.658	6.08998e-52	Endothelial cells	Ckb
2.61484e-56	-1.56903	0.171	0.39	6.64144e-52	Endothelial cells	Ppef2
5.93993e-56	-1.14328	0.226	0.447	1.50868e-51	Endothelial cells	Atp1a3
1.46533e-55	-1.60296	0.21	0.417	3.72178e-51	Endothelial cells	AABR07068851.1
8.10563e-55	-1.2268	0.221	0.446	2.05875e-50	Endothelial cells	Msi1
2.16212e-54	-1.56502	0.248	0.444	5.49158e-50	Endothelial cells	Pde6a
1.95218e-53	-2.0015	0.122	0.335	4.95835e-49	Endothelial cells	RGD1560925
8.3777e-53	-1.30651	0.391	0.536	2.12785e-48	Endothelial cells	Kif1b
2.43217e-51	-1.36531	0.286	0.473	6.17747e-47	Endothelial cells	Cabp4
1.94472e-50	-1.14055	0.512	0.594	4.93939e-46	Endothelial cells	Luc7l3
1.02745e-49	-1.40376	0.239	0.433	2.60962e-45	Endothelial cells	Nxnl2
1.88971e-49	-1.47563	0.234	0.424	4.79968e-45	Endothelial cells	Kcnb1
3.17991e-48	-1.24494	0.074	0.277	8.07666e-44	Endothelial cells	Rorb
1.36285e-47	-1.11065	0.169	0.369	3.4615e-43	Endothelial cells	Slc22a17
3.37236e-47	-1.45196	0.259	0.439	8.56545e-43	Endothelial cells	Rgs9
1.85991e-45	-1.16465	0.124	0.316	4.72398e-41	Endothelial cells	LOC108348172.1
1.80243e-44	-1.30944	0.153	0.347	4.578e-40	Endothelial cells	Tsks
2.92345e-44	-1.19172	0.121	0.318	7.42526e-40	Endothelial cells	Stmn3
7.85671e-44	-1.28773	0.071	0.266	1.99553e-39	Endothelial cells	Camk2b
8.92938e-44	-1.22251	0.129	0.322	2.26797e-39	Endothelial cells	Bcat1
1.24505e-43	-1.01805	0.09	0.285	3.16231e-39	Endothelial cells	Sez6l2
2.65019e-43	-1.52479	0.229	0.396	6.73121e-39	Endothelial cells	Cep164
3.64304e-43	-1.32416	0.142	0.332	9.25295e-39	Endothelial cells	Map2
4.72686e-43	-1.02256	0.544	0.583	1.20057e-38	Endothelial cells	Mdh1
1.69549e-42	-1.08455	0.424	0.531	4.30636e-38	Endothelial cells	Laptm4b
4.13056e-42	-1.25427	0.166	0.355	1.04912e-37	Endothelial cells	Ppp2r2b
2.25728e-41	-1.44685	0.158	0.336	5.73326e-37	Endothelial cells	Ankrd33b
6.17329e-41	-1.27694	0.618	0.617	1.56795e-36	Endothelial cells	Gnb1
9.47681e-41	-1.41849	0.118	0.3	2.40702e-36	Endothelial cells	Grk1
4.71218e-39	-1.04447	0.52	0.584	1.19685e-34	Endothelial cells	Anp32e
2.10959e-37	-1.34507	0.177	0.34	5.35816e-33	Endothelial cells	Cadm1
3.35485e-37	-1.45678	0.095	0.264	8.52098e-33	Endothelial cells	Caly
9.71282e-37	-1.21862	0.165	0.333	2.46696e-32	Endothelial cells	Slc25a33
1.10337e-36	-1.28619	0.422	0.512	2.80244e-32	Endothelial cells	Tnrc6b
3.43361e-36	-1.23314	0.097	0.263	8.72102e-32	Endothelial cells	Usp2
1.79772e-35	-1.07322	0.211	0.375	4.56603e-31	Endothelial cells	Tusc3
5.08067e-35	-1.03003	0.408	0.501	1.29044e-30	Endothelial cells	AABR07044711.1
5.21783e-35	-1.03033	0.187	0.345	1.32528e-30	Endothelial cells	Rab3a
2.65005e-34	-1.02402	0.128	0.293	6.73086e-30	Endothelial cells	Rufy3
5.04905e-34	-1.79473	0.132	0.29	1.28241e-29	Endothelial cells	Ptgds
6.44721e-34	-1.07462	0.204	0.353	1.63753e-29	Endothelial cells	Nsf
8.99664e-34	-1.3559	0.138	0.294	2.28506e-29	Endothelial cells	Epb41l2
9.44196e-34	-1.32814	0.221	0.368	2.39816e-29	Endothelial cells	Cdhr1
7.83726e-33	-1.02383	0.108	0.268	1.99059e-28	Endothelial cells	Zfp365
1.00492e-32	-1.23321	0.253	0.401	2.5524e-28	Endothelial cells	Fabp5
2.62457e-31	-1.28497	0.1	0.251	6.66614e-27	Endothelial cells	Pcare
8.33139e-31	-1.08176	0.121	0.271	2.11609e-26	Endothelial cells	Rtn1
1.3516e-27	-1.21934	0.146	0.281	3.43292e-23	Endothelial cells	Lpcat1
3.75791e-27	-1.16673	0.335	0.431	9.54472e-23	Endothelial cells	Rdh11
7.60603e-27	-1.21738	0.164	0.296	1.93185e-22	Endothelial cells	Optn
1.18317e-26	-1.09612	0.447	0.494	3.00512e-22	Endothelial cells	Pnisr
1.50437e-26	-1.09271	0.248	0.375	3.82095e-22	Endothelial cells	Reep6
5.56102e-26	-1.14479	0.29	0.394	1.41244e-21	Endothelial cells	Tbcc
3.49465e-25	-1.31722	0.214	0.329	8.87607e-21	Endothelial cells	Stard7
6.91657e-25	-1.12962	0.124	0.252	1.75674e-20	Endothelial cells	Cds1
8.21097e-24	-1.82309	0.204	0.315	2.0855e-19	Endothelial cells	Gng13
1.08242e-23	-1.40814	0.203	0.311	2.74924e-19	Endothelial cells	Dyrk2
1.41598e-23	-1.15649	0.329	0.41	3.59645e-19	Endothelial cells	Lgalsl
2.99458e-23	-1.01355	0.172	0.29	7.60594e-19	Endothelial cells	Zwint
3.60193e-23	-1.06832	0.137	0.259	9.14854e-19	Endothelial cells	Herc3
5.47805e-23	-1.05743	0.19	0.309	1.39137e-18	Endothelial cells	Uckl1
5.12868e-22	-1.06372	0.198	0.311	1.30263e-17	Endothelial cells	Bbs4
5.19256e-22	-1.40368	0.305	0.378	1.31886e-17	Endothelial cells	Cers4
1.92649e-21	-1.20936	0.356	0.417	4.89309e-17	Endothelial cells	Srsf6
2.80806e-21	-1.01653	0.234	0.339	7.13218e-17	Endothelial cells	Tmem237
4.3917e-21	-1.39845	0.311	0.38	1.11545e-16	Endothelial cells	Slc31a2
4.36621e-20	-1.04434	0.323	0.397	1.10897e-15	Endothelial cells	Ddx17
4.17998e-19	-1.31461	0.211	0.298	1.06167e-14	Endothelial cells	Tob2
1.99917e-18	-1.03421	0.407	0.442	5.0777e-14	Endothelial cells	Ppp1cc
2.81856e-18	-1.06907	0.256	0.341	7.15886e-14	Endothelial cells	Fbxl5
4.78985e-18	-1.01262	0.362	0.409	1.21658e-13	Endothelial cells	Atp2b1
2.41554e-17	-1.14878	0.231	0.312	6.13522e-13	Endothelial cells	Kdm5b
3.9502e-16	-1.25249	0.303	0.358	1.00331e-11	Endothelial cells	Arl4d
3.82399e-15	-1.13513	0.314	0.368	9.71254e-11	Endothelial cells	Ip6k2
4.27538e-15	-1.03663	0.195	0.278	1.0859e-10	Endothelial cells	Icmt
3.34385e-14	-1.10662	0.241	0.306	8.49304e-10	Endothelial cells	Crcp
1.20956e-13	-1.04619	0.211	0.283	3.07216e-09	Endothelial cells	Galnt7
5.3663e-13	-1.10268	0.319	0.359	1.36299e-08	Endothelial cells	Nfyb
2.06287e-12	-1.32427	0.266	0.329	5.23949e-08	Endothelial cells	Car2
4.28572e-12	-1.14837	0.533	0.482	1.08853e-07	Endothelial cells	Hmgb2
1.65556e-10	-1.02325	0.305	0.337	4.20495e-06	Endothelial cells	Arhgap5
2.69966e-10	-1.02762	0.31	0.34	6.85687e-06	Endothelial cells	Nars
4.46907e-09	-1.60816	0.194	0.253	0.00011351	Endothelial cells	Pcp4
0	4.41781	0.772	0.014	0	Macrophages	C1qa
0	4.40113	0.814	0.032	0	Macrophages	Anxa3
0	4.17874	0.757	0.013	0	Macrophages	Aif1
0	4.10643	0.99	0.508	0	Macrophages	Tmsb4x
0	4.10416	0.713	0.014	0	Macrophages	C1qb
0	3.93332	0.727	0.013	0	Macrophages	Tyrobp
0	3.88678	0.732	0.013	0	Macrophages	Fcer1g
0	3.84757	0.696	0.028	0	Macrophages	Tmem176a
0	3.84577	0.812	0.124	0	Macrophages	Npc2
0	3.78996	0.732	0.05	0	Macrophages	Tmem176b
0	3.78165	0.937	0.236	0	Macrophages	LOC100364435
0	3.60337	0.607	0.012	0	Macrophages	C1qc
0	3.56144	0.68	0.027	0	Macrophages	Rgs10
0	3.30504	0.482	0.013	0	Macrophages	Lyz2
0	3.26711	0.861	0.164	0	Macrophages	B2m
0	3.04121	0.675	0.131	0	Macrophages	Rnaset2
0	2.98414	0.583	0.053	0	Macrophages	Ctsh
0	2.9633	0.534	0.011	0	Macrophages	Laptm5
0	2.92905	0.445	0.012	0	Macrophages	Csf1r
0	2.73361	0.494	0.024	0	Macrophages	Ctsz
0	2.53518	0.4	0.011	0	Macrophages	Pld4
0	2.49528	0.645	0.098	0	Macrophages	Sparc
0	2.49173	0.44	0.03	0	Macrophages	Arpc1b
0	2.48427	0.452	0.03	0	Macrophages	Limd2
0	2.45816	0.466	0.068	0	Macrophages	Timp2
0	2.43432	0.435	0.027	0	Macrophages	Arhgdib
0	2.3571	0.386	0.02	0	Macrophages	Coro1a
0	2.32758	0.303	0.01	0	Macrophages	C3
0	2.23961	0.29	0.008	0	Macrophages	LOC100910270
0	2.21772	0.403	0.05	0	Macrophages	Hexb
0	2.13768	0.303	0.009	0	Macrophages	Ltc4s
0	2.13484	0.376	0.035	0	Macrophages	Cd48
0	2.13443	0.344	0.009	0	Macrophages	Trem2
0	2.09382	0.304	0.026	0	Macrophages	Cfh
0	2.08919	0.348	0.01	0	Macrophages	LOC100911825
0	2.01346	0.289	0.008	0	Macrophages	Ctss
0	1.94398	0.315	0.011	0	Macrophages	Cd53
0	1.8734	0.278	0.009	0	Macrophages	Plek
0	1.83004	0.263	0.01	0	Macrophages	Gmfg
0	1.77966	0.252	0.009	0	Macrophages	Ly86
0	1.76755	0.266	0.018	0	Macrophages	Tspo
0	1.73101	0.283	0.009	0	Macrophages	Bin2
0	1.57068	0.261	0.009	0	Macrophages	Apbb1ip
8.60267e-308	1.75713	0.317	0.031	2.18499e-303	Macrophages	Fxyd5
3.88688e-306	2.08495	0.377	0.045	9.87228e-302	Macrophages	Cyba
7.03965e-300	2.11277	0.417	0.056	1.788e-295	Macrophages	Ucp2
3.32854e-289	4.98372	0.979	0.757	8.45415e-285	Macrophages	Cst3
1.35842e-284	3.0646	0.871	0.353	3.45026e-280	Macrophages	Ftl1
6.56996e-279	2.23104	0.374	0.049	1.6687e-274	Macrophages	Tf
7.91895e-275	1.82649	0.303	0.031	2.01133e-270	Macrophages	Srgn
6.65316e-263	2.30307	0.44	0.073	1.68984e-258	Macrophages	Sh3bgrl3
2.04796e-262	1.49758	0.697	0.162	5.20161e-258	Macrophages	Apoe
5.30736e-257	2.35894	0.47	0.083	1.34802e-252	Macrophages	Lamp2
6.58481e-257	2.56211	0.565	0.128	1.67248e-252	Macrophages	Gng10
2.38e-252	2.76953	0.896	0.44	6.04497e-248	Macrophages	Rps12
3.40928e-240	2.20038	0.423	0.072	8.65922e-236	Macrophages	Grn
4.07634e-221	1.9882	0.421	0.075	1.03535e-216	Macrophages	Ifngr1
3.58805e-218	2.4445	0.955	0.686	9.11329e-214	Macrophages	Tpt1
2.98444e-215	2.19216	0.445	0.088	7.58017e-211	Macrophages	Gpx1
1.88415e-196	1.44966	0.35	0.055	4.78556e-192	Macrophages	Pltp
1.27102e-191	1.78152	0.313	0.048	3.22827e-187	Macrophages	Clic1
1.81001e-187	2.30197	0.93	0.659	4.59725e-183	Macrophages	Fth1
3.87129e-179	2.19729	0.91	0.602	9.83268e-175	Macrophages	Rps23
8.71085e-177	2.06305	0.468	0.113	2.21247e-172	Macrophages	Ywhah
1.63086e-173	2.08739	0.896	0.606	4.14222e-169	Macrophages	Rpl35
1.27662e-171	2.09912	0.93	0.664	3.24249e-167	Macrophages	Rplp1
1.90456e-167	2.29774	0.725	0.302	4.8374e-163	Macrophages	Actb
6.54114e-166	2.05706	0.536	0.153	1.66138e-161	Macrophages	Marcks
1.47395e-161	1.61079	0.277	0.043	3.74369e-157	Macrophages	Pycard
1.42065e-157	1.80669	0.268	0.042	3.60831e-153	Macrophages	Cd302
4.0285e-157	1.99457	0.922	0.687	1.0232e-152	Macrophages	LOC108350501
3.08986e-156	2.07901	0.831	0.487	7.84793e-152	Macrophages	Rpl10
1.11315e-153	2.22673	0.826	0.51	2.82729e-149	Macrophages	Rps4x
2.82318e-149	1.86663	0.911	0.648	7.1706e-145	Macrophages	Rpl37a
1.4455e-147	2.13112	0.819	0.485	3.67143e-143	Macrophages	Rps11
6.25175e-146	1.92763	0.882	0.584	1.58788e-141	Macrophages	Rpl27a
2.74497e-140	2.0545	0.776	0.432	6.97195e-136	Macrophages	Rps9
1.14277e-132	1.61312	0.922	0.677	2.90253e-128	Macrophages	Fau
1.49231e-128	1.82027	0.868	0.646	3.79033e-124	Macrophages	Rps27a.1
1.62772e-126	1.43985	0.941	0.769	4.13426e-122	Macrophages	Rpl41
1.48427e-125	1.80467	0.85	0.584	3.7699e-121	Macrophages	Rps16
2.15956e-124	1.7113	0.336	0.077	5.48507e-120	Macrophages	LOC108349548
1.24052e-123	1.80909	0.882	0.651	3.15081e-119	Macrophages	Rplp0
3.49816e-120	-1.18082	0.974	0.998	8.88497e-116	Macrophages	AC134224.3
1.51987e-118	1.78523	0.854	0.595	3.86032e-114	Macrophages	Rps27
7.55328e-116	1.7029	0.341	0.084	1.91846e-111	Macrophages	RT1-CE4
2.33861e-115	1.73297	0.79	0.493	5.93984e-111	Macrophages	Rps20
9.65646e-115	1.79614	0.823	0.567	2.45264e-110	Macrophages	Rps18l1
8.65415e-113	1.98435	0.774	0.48	2.19807e-108	Macrophages	LOC100361854
1.93648e-112	1.84906	0.777	0.484	4.91846e-108	Macrophages	LOC100360841
2.81105e-112	1.79269	0.793	0.523	7.1398e-108	Macrophages	Rpl11
4.82034e-112	1.89912	0.369	0.102	1.22432e-107	Macrophages	LOC100360087
1.9163e-111	1.65876	0.814	0.522	4.86721e-107	Macrophages	Rpl28
1.32739e-108	1.66432	0.797	0.534	3.37143e-104	Macrophages	Rpsa
2.87879e-108	1.60624	0.842	0.607	7.31183e-104	Macrophages	Rps3a
1.18737e-105	1.87893	0.692	0.381	3.01579e-101	Macrophages	Rpl22
5.16203e-105	1.71451	0.746	0.452	1.3111e-100	Macrophages	Rps21
4.00392e-104	1.85161	0.678	0.375	1.01696e-99	Macrophages	Pfn1
5.26578e-104	1.8461	0.697	0.399	1.33746e-99	Macrophages	Rpl12
1.25217e-102	1.40176	0.283	0.065	3.1804e-98	Macrophages	Fam49b
1.32927e-100	2.08293	0.645	0.338	3.37621e-96	Macrophages	Psap
2.59025e-100	1.94369	0.602	0.298	6.57899e-96	Macrophages	Rpl36al
1.93142e-99	1.43848	0.842	0.584	4.90562e-95	Macrophages	Rpl36
1.35864e-98	1.7312	0.744	0.458	3.4508e-94	Macrophages	Rps28
1.39675e-94	-1.15726	0.572	0.901	3.54761e-90	Macrophages	Ldha
1.82882e-94	1.48959	0.824	0.608	4.64501e-90	Macrophages	Rpl14
2.01941e-94	1.32156	0.88	0.661	5.1291e-90	Macrophages	Uba52
3.11319e-93	-1.23674	0.583	0.903	7.90718e-89	Macrophages	Unc119
4.82098e-93	1.54565	0.831	0.622	1.22448e-88	Macrophages	Rps14
7.01498e-93	1.8361	0.673	0.392	1.78173e-88	Macrophages	Rps5
4.57158e-92	1.62263	0.443	0.159	1.16113e-87	Macrophages	Gnai2
5.10225e-92	1.46505	0.854	0.663	1.29592e-87	Macrophages	LOC100362830
2.87783e-91	1.48553	0.79	0.554	7.30939e-87	Macrophages	Rpl26
8.88965e-91	1.51119	0.407	0.134	2.25788e-86	Macrophages	Cotl1
1.25664e-90	1.39536	0.845	0.626	3.19173e-86	Macrophages	Rpl24
3.4132e-89	1.42726	0.857	0.66	8.66919e-85	Macrophages	Rps15a
1.31061e-88	1.76303	0.433	0.162	3.32882e-84	Macrophages	Eef1a1
1.33166e-87	1.46606	0.828	0.633	3.38229e-83	Macrophages	Rpl13
1.8406e-86	1.61693	0.402	0.142	4.67494e-82	Macrophages	Psme1
1.53942e-85	1.46049	0.809	0.616	3.90998e-81	Macrophages	Rpl34
1.6035e-84	1.3764	0.847	0.661	4.07274e-80	Macrophages	Rpl23
3.61303e-84	1.15647	0.927	0.794	9.17673e-80	Macrophages	Rps8
2.9557e-83	1.56692	0.774	0.546	7.50719e-79	Macrophages	Rpl18a
1.02878e-82	1.35861	0.83	0.613	2.61299e-78	Macrophages	Rpl3
1.0696e-82	1.6367	0.718	0.485	2.71669e-78	Macrophages	LOC684988
6.07033e-82	1.53857	0.744	0.518	1.5418e-77	Macrophages	Rpl5
9.52819e-82	1.87228	0.454	0.189	2.42007e-77	Macrophages	Ctsb
1.48557e-80	1.40169	0.803	0.577	3.77319e-76	Macrophages	Rpl7
2.4168e-80	1.36494	0.777	0.557	6.13843e-76	Macrophages	Rps3
3.93552e-80	-1.61462	0.317	0.711	9.99584e-76	Macrophages	Elovl4
5.09535e-78	1.5725	0.744	0.527	1.29417e-73	Macrophages	Rpl29
5.94942e-78	1.726	0.607	0.34	1.51109e-73	Macrophages	LOC100360781
2.3211e-76	-1.73523	0.388	0.723	5.89537e-72	Macrophages	Rp1
1.4749e-74	1.50089	0.737	0.514	3.74611e-70	Macrophages	Rps24
8.2589e-74	1.64373	0.553	0.289	2.09768e-69	Macrophages	Rpl32
9.18577e-74	1.52831	0.659	0.423	2.33309e-69	Macrophages	Rpl6
6.40081e-72	-1.18049	0.577	0.874	1.62574e-67	Macrophages	Rom1
8.21965e-71	1.35745	0.816	0.66	2.08771e-66	Macrophages	Rps2
1.43324e-70	-1.57127	0.308	0.675	3.64029e-66	Macrophages	Pcmtd2
2.56995e-70	-1.68483	0.249	0.623	6.5274e-66	Macrophages	Neurod1
1.0334e-69	-1.36595	0.668	0.875	2.62474e-65	Macrophages	Pdc
5.44521e-68	1.04734	0.894	0.753	1.38303e-63	Macrophages	Rpl19
6.13763e-67	1.6098	0.487	0.242	1.5589e-62	Macrophages	AC141489.1
7.98501e-67	1.40978	0.713	0.508	2.02811e-62	Macrophages	Rps10l1
8.62811e-67	-1.41783	0.388	0.71	2.19145e-62	Macrophages	Cnga1
1.36361e-66	1.10925	0.861	0.717	3.46344e-62	Macrophages	LOC100360449
6.164e-66	1.34955	0.363	0.131	1.5656e-61	Macrophages	Sat1
1.27388e-65	1.42067	0.671	0.441	3.23552e-61	Macrophages	LOC100362027
2.70172e-65	-1.35429	0.24	0.616	6.86211e-61	Macrophages	Prnp
7.82358e-65	-1.3635	0.336	0.679	1.98711e-60	Macrophages	Aipl1
2.05195e-64	-1.09576	0.489	0.782	5.21175e-60	Macrophages	Eno1
2.80679e-63	-1.13393	0.517	0.801	7.12896e-59	Macrophages	Rcvrn
7.05138e-62	-1.25621	0.53	0.786	1.79098e-57	Macrophages	Guca1a
8.77202e-62	-1.52111	0.289	0.633	2.22801e-57	Macrophages	Map1b
3.79871e-61	-1.09804	0.602	0.879	9.64835e-57	Macrophages	Ddx5
4.24068e-59	-1.31882	0.452	0.741	1.07709e-54	Macrophages	Tulp1
3.39967e-58	1.18307	0.259	0.08	8.63482e-54	Macrophages	Ifi27
6.90707e-58	1.32812	0.753	0.595	1.75433e-53	Macrophages	Rpl17
9.63994e-58	1.34253	0.31	0.112	2.44845e-53	Macrophages	Arhgdia
2.62263e-57	-1.47599	0.247	0.584	6.66122e-53	Macrophages	Cplx4
1.33327e-56	1.50169	0.576	0.328	3.38638e-52	Macrophages	RT1-CE10
2.48453e-56	-1.11238	0.325	0.679	6.31047e-52	Macrophages	Pcbp4
1.1859e-55	1.33941	0.647	0.454	3.01207e-51	Macrophages	Rack1
1.31325e-55	1.40911	0.419	0.194	3.33553e-51	Macrophages	Cd81
8.44328e-55	-1.02178	0.402	0.716	2.14451e-50	Macrophages	Sec62
1.71046e-54	-1.33954	0.2	0.533	4.3444e-50	Macrophages	Syt1
2.9052e-54	1.3231	0.57	0.347	7.37892e-50	Macrophages	Rpl31
5.10971e-54	-1.00171	0.873	0.97	1.29781e-49	Macrophages	Gngt1
2.67582e-53	1.20783	0.717	0.538	6.79631e-49	Macrophages	Rpl21.3
4.3617e-53	-1.13343	0.743	0.893	1.10783e-48	Macrophages	Rho
5.30342e-53	-1.15028	0.471	0.772	1.34702e-48	Macrophages	Rsrp1
1.96833e-52	1.40853	0.417	0.197	4.99937e-48	Macrophages	Lgmn
9.58084e-52	1.3293	0.61	0.403	2.43344e-47	Macrophages	Rps17
1.51344e-51	-1.28989	0.205	0.533	3.84399e-47	Macrophages	Laptm4b
5.59724e-51	-1.20982	0.233	0.562	1.42164e-46	Macrophages	Aldoc
1.17162e-50	-1.18939	0.376	0.675	2.97581e-46	Macrophages	Agpat3
1.36155e-50	-1.20155	0.264	0.583	3.45821e-46	Macrophages	Slc17a7
1.54731e-50	1.4618	0.489	0.271	3.93002e-46	Macrophages	Rps19
1.68621e-50	-1.38052	0.273	0.577	4.2828e-46	Macrophages	Guca1b
3.41333e-49	1.19246	0.715	0.552	8.66952e-45	Macrophages	Rps15
3.8635e-49	1.08788	0.739	0.573	9.8129e-45	Macrophages	Rpl38
4.00831e-49	-1.13456	0.254	0.578	1.01807e-44	Macrophages	Atp1b2
6.96893e-49	-1.31294	0.195	0.504	1.77004e-44	Macrophages	Snap25
9.85774e-49	-1.19937	0.384	0.691	2.50377e-44	Macrophages	Rtn4
2.37274e-48	-1.3059	0.48	0.712	6.02652e-44	Macrophages	Hk2
3.24348e-48	1.13792	0.72	0.558	8.23811e-44	Macrophages	Rpl15
3.63204e-48	1.04455	0.704	0.512	9.22502e-44	Macrophages	Rpl27
6.10064e-48	1.26983	0.301	0.118	1.5495e-43	Macrophages	Tpm3
7.48152e-48	-1.2113	0.242	0.553	1.90023e-43	Macrophages	Hist3h2ba
1.3606e-47	-1.11042	0.283	0.596	3.45578e-43	Macrophages	Luc7l3
8.26752e-47	-1.36243	0.318	0.593	2.09987e-42	Macrophages	Cngb1
1.7787e-46	-1.14172	0.217	0.528	4.51772e-42	Macrophages	Scg5
1.49491e-45	-1.12511	0.31	0.612	3.79693e-41	Macrophages	Prpf4b
1.6632e-45	-1.05173	0.518	0.779	4.22437e-41	Macrophages	Atf4
6.22596e-45	1.12205	0.699	0.521	1.58133e-40	Macrophages	Cfl1
1.46864e-44	-1.40661	0.195	0.489	3.7302e-40	Macrophages	Dmd
1.55314e-44	-1.09289	0.372	0.651	3.94481e-40	Macrophages	Rtbdn
1.96212e-44	-1.20231	0.306	0.601	4.9836e-40	Macrophages	Fam57b
2.31927e-44	-1.49168	0.301	0.561	5.89071e-40	Macrophages	Mgarp
3.7361e-44	1.18091	0.443	0.226	9.48932e-40	Macrophages	Ctsl
6.48533e-44	-1.31768	0.177	0.481	1.64721e-39	Macrophages	Lrit1
1.87976e-43	-1.12224	0.23	0.529	4.77441e-39	Macrophages	Cpe
2.14577e-43	-1.1574	0.235	0.536	5.45004e-39	Macrophages	Kif1b
4.55445e-43	-1.35091	0.233	0.514	1.15678e-38	Macrophages	Sncb
9.56305e-43	-1.12428	0.214	0.511	2.42892e-38	Macrophages	Vamp2
6.52545e-42	-1.19745	0.203	0.497	1.6574e-37	Macrophages	Slc38a3
1.31697e-41	-1.45672	0.123	0.4	3.34497e-37	Macrophages	Rims2
1.69683e-40	-1.16734	0.374	0.62	4.30979e-36	Macrophages	Gnb1
2.17235e-40	-1.18458	0.231	0.513	5.51756e-36	Macrophages	Tnrc6b
5.42337e-40	1.03163	0.277	0.11	1.37748e-35	Macrophages	Basp1
5.88628e-40	1.29431	0.32	0.146	1.49506e-35	Macrophages	Fuca1
1.21176e-38	-1.35395	0.231	0.493	3.07775e-34	Macrophages	Slc24a1
2.32391e-38	-1.16002	0.249	0.521	5.90249e-34	Macrophages	Slc6a6
3.48374e-38	1.2821	0.45	0.267	8.84836e-34	Macrophages	LOC103690821
5.80034e-38	-1.13847	0.264	0.536	1.47323e-33	Macrophages	Pde6b
1.79323e-37	1.20933	0.431	0.242	4.55463e-33	Macrophages	Lamp1
2.77709e-37	-1.14802	0.226	0.497	7.05352e-33	Macrophages	Pnisr
2.92479e-37	-1.20906	0.205	0.476	7.42868e-33	Macrophages	Osbp2
7.02056e-37	-1.07722	0.207	0.479	1.78315e-32	Macrophages	Arl6
1.53689e-36	1.26045	0.358	0.182	3.90354e-32	Macrophages	Rps6
1.76791e-36	-1.06223	0.174	0.445	4.49032e-32	Macrophages	Atp1a3
1.33957e-35	-1.05847	0.353	0.603	3.40237e-31	Macrophages	RGD1597339
1.68301e-35	-1.16693	0.193	0.455	4.27467e-31	Macrophages	Acsl6
1.76324e-34	1.22477	0.503	0.335	4.47845e-30	Macrophages	Eef1b2
2.03599e-34	1.1253	0.325	0.161	5.17122e-30	Macrophages	LOC100359951
3.53869e-33	-1.06959	0.162	0.418	8.98793e-29	Macrophages	Impdh1
7.89202e-33	-1.24609	0.212	0.459	2.0045e-28	Macrophages	Cep290
1.13409e-32	-1.22845	0.15	0.389	2.88048e-28	Macrophages	Ppef2
1.59848e-32	-1.19472	0.233	0.472	4.05997e-28	Macrophages	Cabp4
2.03549e-32	1.16363	0.44	0.268	5.16995e-28	Macrophages	Arpc2
2.91201e-32	1.02005	0.645	0.514	7.39621e-28	Macrophages	Rpl18
4.18559e-32	1.22328	0.412	0.248	1.0631e-27	Macrophages	Rps27a
6.00809e-32	-1.12893	0.283	0.52	1.52599e-27	Macrophages	Ddit4
6.2468e-32	-1.30994	0.144	0.38	1.58663e-27	Macrophages	Cers4
7.22299e-32	-1.18764	0.162	0.403	1.83457e-27	Macrophages	Rd3
7.26195e-32	1.10183	0.555	0.407	1.84446e-27	Macrophages	Rpl23a
1.07832e-31	-1.2412	0.188	0.423	2.73882e-27	Macrophages	Kcnb1
1.15982e-31	-1.06651	0.381	0.612	2.94583e-27	Macrophages	Cited2
1.8604e-31	1.09172	0.37	0.2	4.72522e-27	Macrophages	Rhoa
7.95917e-31	-1.2565	0.163	0.395	2.02155e-26	Macrophages	Cep164
1.06582e-30	1.07555	0.468	0.307	2.70707e-26	Macrophages	Rpl4
1.75732e-30	-1.25229	0.219	0.442	4.46341e-26	Macrophages	Pde6a
3.396e-30	-1.30841	0.155	0.381	8.62551e-26	Macrophages	Slc31a2
3.44522e-30	-1.24887	0.19	0.415	8.7505e-26	Macrophages	AABR07068851.1
8.45242e-30	-1.00788	0.15	0.383	2.14683e-25	Macrophages	Bex2
1.28048e-29	-1.04272	0.209	0.444	3.25229e-25	Macrophages	Msi1
1.66095e-29	-1.19946	0.137	0.361	4.21864e-25	Macrophages	Nfyb
2.85125e-29	-1.21118	0.118	0.339	7.24189e-25	Macrophages	Cadm1
3.87186e-29	1.00873	0.283	0.137	9.83413e-25	Macrophages	Gnb2
5.05433e-29	-1.13878	0.143	0.369	1.28375e-24	Macrophages	Ip6k2
1.09325e-28	-1.01518	0.2	0.429	2.77675e-24	Macrophages	Gpbp1
2.4917e-28	-1.08687	0.212	0.438	6.32866e-24	Macrophages	Rgs9
7.84174e-28	1.14917	0.402	0.244	1.99172e-23	Macrophages	Atox1
1.92732e-27	1.12371	0.428	0.277	4.8952e-23	Macrophages	LOC108348142
3.15991e-27	-1.22879	0.125	0.335	8.02586e-23	Macrophages	Ankrd33b
4.90853e-27	-1.24173	0.15	0.359	1.24672e-22	Macrophages	Arl4d
5.14008e-27	-1.07445	0.139	0.359	1.30553e-22	Macrophages	Ccdc126
9.9002e-27	1.05317	0.454	0.306	2.51455e-22	Macrophages	Rps25
1.57664e-26	-1.02855	0.157	0.374	4.0045e-22	Macrophages	Tusc3
2.87322e-26	-1.04908	0.181	0.398	7.2977e-22	Macrophages	Ankrd12
6.23808e-26	-1.01475	0.115	0.321	1.58441e-21	Macrophages	Bcat1
9.93079e-26	-1.01451	0.122	0.33	2.52232e-21	Macrophages	Map2
1.13592e-25	-1.05593	0.158	0.368	2.88512e-21	Macrophages	Cdhr1
1.16727e-25	1.11708	0.315	0.175	2.96474e-21	Macrophages	Rpl30
4.69951e-25	-1.07222	0.136	0.339	1.19363e-20	Macrophages	Tmem237
5.25953e-25	1.09838	0.332	0.19	1.33587e-20	Macrophages	Arpc3
6.20115e-25	-1.56363	0.151	0.345	1.57503e-20	Macrophages	Hspa1b
8.58945e-25	1.21523	0.414	0.272	2.18163e-20	Macrophages	LOC108349682
3.48325e-24	1.09971	0.337	0.199	8.84712e-20	Macrophages	Rps10
4.42895e-24	-1.15259	0.106	0.298	1.12491e-19	Macrophages	Grk1
4.96883e-24	-1.19656	0.137	0.329	1.26203e-19	Macrophages	Stard7
6.79666e-24	-1.37396	0.141	0.333	1.72628e-19	Macrophages	RGD1560925
1.03769e-23	-1.03781	0.089	0.275	2.63564e-19	Macrophages	Rorb
1.55092e-23	-1.00094	0.23	0.431	3.93918e-19	Macrophages	Nxnl2
4.70323e-23	1.00547	0.45	0.307	1.19457e-18	Macrophages	Dstn
5.24822e-23	1.15788	0.473	0.348	1.333e-18	Macrophages	Eef1g
1.01308e-22	-1.01209	0.12	0.311	2.57311e-18	Macrophages	Bbs4
5.61015e-22	1.11718	0.277	0.147	1.42492e-17	Macrophages	Junb
1.28406e-21	-1.46791	0.082	0.253	3.26139e-17	Macrophages	Igfbp7
4.03696e-21	-1.16223	0.09	0.263	1.02535e-16	Macrophages	Caly
8.4675e-21	-1.07913	0.122	0.295	2.15066e-16	Macrophages	Optn
1.56889e-19	1.07947	0.308	0.187	3.98481e-15	Macrophages	Nme2
1.64859e-19	-1.09476	0.104	0.268	4.18726e-15	Macrophages	Rabgef1
4.6025e-19	-1.30784	0.123	0.289	1.16899e-14	Macrophages	Ptgds
6.97848e-17	-1.06616	0.108	0.253	1.77246e-12	Macrophages	Ndrg1
8.898e-17	-1.29264	0.104	0.258	2.26e-12	Macrophages	Clu
3.66668e-15	-1.20675	0.179	0.33	9.31299e-11	Macrophages	Car2
4.36151e-14	-1.0181	0.174	0.315	1.10778e-09	Macrophages	Gng13
1.32548e-08	-1.36448	0.158	0.252	0.000336657	Macrophages	Pcp4
0	6.2235	0.964	0.019	0	Fibroblasts	Mgp
0	5.73242	0.629	0.007	0	Fibroblasts	Tagln
0	5.69324	0.891	0.019	0	Fibroblasts	Crip1
0	4.70874	0.876	0.009	0	Fibroblasts	Myl9
0	4.62205	0.844	0.011	0	Fibroblasts	Tpm2
0	4.59898	0.899	0.004	0	Fibroblasts	Rgs5
0	4.37629	0.863	0.026	0	Fibroblasts	RGD1564664
0	4.33322	0.735	0.003	0	Fibroblasts	Acta2
0	4.25685	0.682	0.004	0	Fibroblasts	Vtn
0	4.16658	0.954	0.243	0	Fibroblasts	Igfbp7
0	4.12167	0.859	0.01	0	Fibroblasts	Ppp1r14a
0	4.11948	0.733	0.004	0	Fibroblasts	Higd1b
0	4.0482	0.876	0.011	0	Fibroblasts	Ndufa4l2
0	4.03611	0.874	0.033	0	Fibroblasts	Cald1
0	4.01444	0.602	0.003	0	Fibroblasts	Kcnj8
0	3.88427	0.627	0.003	0	Fibroblasts	Abcc9
0	3.71449	0.766	0.019	0	Fibroblasts	Ifitm3
0	3.65856	0.691	0.034	0	Fibroblasts	Csrp1
0	3.62334	0.731	0.047	0	Fibroblasts	Tpm1
0	3.47985	0.775	0.141	0	Fibroblasts	Junb
0	3.45466	0.638	0.037	0	Fibroblasts	Cebpd
0	3.42477	0.731	0.084	0	Fibroblasts	Id3
0	3.37186	0.806	0.018	0	Fibroblasts	Bcam
0	3.35828	0.798	0.044	0	Fibroblasts	Lgals1
0	3.31419	0.771	0.01	0	Fibroblasts	Pdgfrb
0	3.24056	0.552	0.006	0	Fibroblasts	Mustn1
0	3.21186	0.832	0.083	0	Fibroblasts	Sparcl1
0	3.03348	0.745	0.02	0	Fibroblasts	Ifitm2
0	3.00704	0.611	0.005	0	Fibroblasts	Map3k7cl
0	2.99139	0.789	0.03	0	Fibroblasts	Tagln2
0	2.98872	0.669	0.066	0	Fibroblasts	Cebpb
0	2.96567	0.779	0.086	0	Fibroblasts	2023-09-04
0	2.93461	0.665	0.075	0	Fibroblasts	Vim
0	2.9198	0.699	0.009	0	Fibroblasts	Mcam
0	2.90916	0.301	0.006	0	Fibroblasts	Sncg
0	2.83968	0.699	0.031	0	Fibroblasts	Txnip
0	2.79347	0.672	0.032	0	Fibroblasts	Tm4sf1
0	2.76017	0.752	0.046	0	Fibroblasts	Itgb1
0	2.74375	0.35	0.006	0	Fibroblasts	Myh11
0	2.74161	0.642	0.004	0	Fibroblasts	Gja4
0	2.70538	0.463	0.009	0	Fibroblasts	Rasd1
0	2.63439	0.634	0.025	0	Fibroblasts	Hspb1
0	2.62894	0.619	0.003	0	Fibroblasts	Des
0	2.62429	0.604	0.03	0	Fibroblasts	Cavin3
0	2.61762	0.89	0.096	0	Fibroblasts	Sparc
0	2.61334	0.61	0.002	0	Fibroblasts	Rem1
0	2.58739	0.64	0.042	0	Fibroblasts	Hes1
0	2.57788	0.63	0.018	0	Fibroblasts	Atp1a2
0	2.57766	0.663	0.008	0	Fibroblasts	Ccdc80
0	2.55993	0.619	0.002	0	Fibroblasts	Foxs1
0	2.54929	0.661	0.016	0	Fibroblasts	Tinagl1
0	2.54081	0.701	0.022	0	Fibroblasts	Anxa5
0	2.52619	0.604	0.02	0	Fibroblasts	Cavin1
0	2.50123	0.585	0.014	0	Fibroblasts	Filip1l
0	2.48848	0.836	0.192	0	Fibroblasts	Cox4i2
0	2.43043	0.583	0.011	0	Fibroblasts	Gjc1
0	2.39246	0.764	0.095	0	Fibroblasts	Cd99
0	2.35084	0.648	0.064	0	Fibroblasts	Rhob
0	2.34714	0.545	0.011	0	Fibroblasts	Tuba1c
0	2.34568	0.817	0.155	0	Fibroblasts	Gstp1
0	2.33388	0.61	0.02	0	Fibroblasts	Nbl1
0	2.31105	0.522	0.027	0	Fibroblasts	Arhgdib
0	2.30662	0.509	0.017	0	Fibroblasts	Gsn
0	2.2983	0.531	0.022	0	Fibroblasts	Nrarp
0	2.2924	0.581	0.004	0	Fibroblasts	Lgals3
0	2.28073	0.493	0.016	0	Fibroblasts	Apold1
0	2.27783	0.629	0.055	0	Fibroblasts	Lmna
0	2.26768	0.547	0.003	0	Fibroblasts	Cspg4
0	2.25684	0.543	0.023	0	Fibroblasts	Flna
0	2.22677	0.581	0.007	0	Fibroblasts	Rbpms
0	2.18003	0.787	0.131	0	Fibroblasts	Myl12a
0	2.16433	0.589	0.027	0	Fibroblasts	Rarres2
0	2.13999	0.857	0.164	0	Fibroblasts	B2m
0	2.12382	0.568	0.055	0	Fibroblasts	Nr4a1
0	2.11786	0.543	0.021	0	Fibroblasts	Lamb2
0	2.10687	0.45	0.047	0	Fibroblasts	Id1
0	2.07189	0.707	0.075	0	Fibroblasts	Ifi27
0	2.06444	0.499	0.026	0	Fibroblasts	Clec2g
0	2.05239	0.781	0.156	0	Fibroblasts	Epas1
0	2.03454	0.493	0.004	0	Fibroblasts	Pdlim1
0	2.01026	0.514	0.027	0	Fibroblasts	Utrn
0	2.00744	0.541	0.022	0	Fibroblasts	Ahnak
0	2.00356	0.453	0.003	0	Fibroblasts	Bgn
0	1.98364	0.425	0.004	0	Fibroblasts	Rgs4
0	1.97973	0.501	0.002	0	Fibroblasts	Aspnl1
0	1.97483	0.51	0.017	0	Fibroblasts	Col4a1
0	1.95897	0.59	0.053	0	Fibroblasts	Crip2
0	1.95864	0.552	0.035	0	Fibroblasts	Jam3
0	1.93554	0.646	0.079	0	Fibroblasts	Vcl
0	1.93328	0.545	0.014	0	Fibroblasts	Fstl1
0	1.92842	0.39	0.004	0	Fibroblasts	NEWGENE-1308171
0	1.92144	0.484	0.011	0	Fibroblasts	Foxc1
0	1.90968	0.516	0.032	0	Fibroblasts	Zfp36
0	1.90522	0.43	0.031	0	Fibroblasts	Pmp22
0	1.89532	0.583	0.033	0	Fibroblasts	Cd48
0	1.88307	0.596	0.06	0	Fibroblasts	Tln1
0	1.88016	0.467	0.001	0	Fibroblasts	Ace2
0	1.82962	0.297	0.014	0	Fibroblasts	Nrgn
0	1.80848	0.438	0.014	0	Fibroblasts	Mylk
0	1.7971	0.64	0.08	0	Fibroblasts	Hopx
0	1.79615	0.442	0.038	0	Fibroblasts	Pcp4l1
0	1.77138	0.417	0.012	0	Fibroblasts	Heyl
0	1.76275	0.276	0.002	0	Fibroblasts	Ifitm1
0	1.75974	0.507	0.024	0	Fibroblasts	Serpinh1
0	1.75787	0.411	0.008	0	Fibroblasts	Serpine2
0	1.75499	0.528	0.05	0	Fibroblasts	Cnn3
0	1.73171	0.585	0.085	0	Fibroblasts	Ier3
0	1.72775	0.427	0.025	0	Fibroblasts	Ier5l
0	1.7223	0.446	0.004	0	Fibroblasts	Emp3
0	1.70837	0.556	0.044	0	Fibroblasts	Rhoc
0	1.69885	0.39	0.002	0	Fibroblasts	Wnt5b
0	1.68248	0.571	0.066	0	Fibroblasts	Esam
0	1.66716	0.507	0.042	0	Fibroblasts	Pla2g16
0	1.66666	0.467	0.029	0	Fibroblasts	Eva1b
0	1.64121	0.368	0.002	0	Fibroblasts	Aoc3
0	1.6333	0.295	0.007	0	Fibroblasts	Tcf15
0	1.62548	0.446	0.037	0	Fibroblasts	Klhl23
0	1.62297	0.411	0.01	0	Fibroblasts	Itga7
0	1.61178	0.419	0.023	0	Fibroblasts	Cdc42ep4
0	1.61005	0.396	0.016	0	Fibroblasts	Pdgfa
0	1.60744	0.368	0.003	0	Fibroblasts	Art3
0	1.60309	0.56	0.049	0	Fibroblasts	Fxyd1
0	1.59195	0.474	0.042	0	Fibroblasts	Zfp36l1
0	1.59046	0.44	0.017	0	Fibroblasts	Rasgrp2
0	1.57957	0.455	0.041	0	Fibroblasts	Smim3
0	1.57913	0.421	0.049	0	Fibroblasts	Col4a4
0	1.57413	0.587	0.063	0	Fibroblasts	Ndrg2
0	1.57189	0.337	0.006	0	Fibroblasts	Igfbp4
0	1.54832	0.333	0.003	0	Fibroblasts	Ogn
0	1.53978	0.461	0.036	0	Fibroblasts	Notch1
0	1.53275	0.474	0.038	0	Fibroblasts	Lhfpl6
0	1.5317	0.354	0.01	0	Fibroblasts	Olfml2a
0	1.53103	0.398	0.024	0	Fibroblasts	Ajuba
0	1.50792	0.389	0.016	0	Fibroblasts	Ecm1
0	1.50316	0.364	0.007	0	Fibroblasts	Anxa1
0	1.49651	0.432	0.029	0	Fibroblasts	Rras
0	1.49143	0.276	0.012	0	Fibroblasts	Zdhhc1
0	1.48825	0.32	0.005	0	Fibroblasts	Adora2a
0	1.47927	0.335	0.006	0	Fibroblasts	Myo1b
0	1.47922	0.438	0.027	0	Fibroblasts	Ebf1
0	1.47446	0.423	0.041	0	Fibroblasts	Rnd3
0	1.4586	0.366	0.005	0	Fibroblasts	Axl
0	1.44133	0.349	0.005	0	Fibroblasts	Ano1
0	1.43756	0.343	0.013	0	Fibroblasts	LOC100912034
0	1.42234	0.413	0.041	0	Fibroblasts	Cd302
0	1.41124	0.392	0.03	0	Fibroblasts	Rcan2
0	1.38923	0.392	0.013	0	Fibroblasts	AC141102.1
0	1.38901	0.345	0.001	0	Fibroblasts	Gprc5c
0	1.38726	0.465	0.049	0	Fibroblasts	Sdc2
0	1.37576	0.366	0.027	0	Fibroblasts	Rhoj
0	1.37166	0.257	0.011	0	Fibroblasts	Spon2
0	1.37149	0.396	0.037	0	Fibroblasts	Prss23
0	1.36791	0.392	0.038	0	Fibroblasts	Fibin
0	1.36767	0.263	0.004	0	Fibroblasts	Snai1
0	1.35496	0.328	0.008	0	Fibroblasts	Lpl
0	1.35264	0.349	0.009	0	Fibroblasts	S100a11
0	1.35071	0.509	0.054	0	Fibroblasts	Ctsh
0	1.34645	0.309	0.002	0	Fibroblasts	Pdgfrl
0	1.3409	0.328	0.004	0	Fibroblasts	Vstm4
0	1.33269	0.417	0.047	0	Fibroblasts	Clic1
0	1.328	0.263	0.01	0	Fibroblasts	Slc30a10
0	1.32643	0.307	0.016	0	Fibroblasts	Gfra2
0	1.3244	0.291	0.006	0	Fibroblasts	Serping1
0	1.31656	0.347	0.024	0	Fibroblasts	Itm2a
0	1.30671	0.291	0.007	0	Fibroblasts	Pear1
0	1.29605	0.33	0.011	0	Fibroblasts	Prelp
0	1.28951	0.316	0.001	0	Fibroblasts	Hrc
0	1.28552	0.335	0.014	0	Fibroblasts	Cobll1
0	1.27672	0.299	0.002	0	Fibroblasts	Tesc
0	1.26698	0.305	0.004	0	Fibroblasts	Ednra
0	1.26491	0.326	0.004	0	Fibroblasts	Atp2b4
0	1.24811	0.349	0.025	0	Fibroblasts	Pkdcc
0	1.24454	0.295	0.001	0	Fibroblasts	C1qtnf1
0	1.23834	0.312	0.005	0	Fibroblasts	Lrrc32
0	1.2303	0.314	0.02	0	Fibroblasts	Timp3
0	1.21998	0.291	0.018	0	Fibroblasts	Gpsm3
0	1.21766	0.309	0.015	0	Fibroblasts	Ets1
0	1.21158	0.33	0.007	0	Fibroblasts	Cped1
0	1.20828	0.37	0.028	0	Fibroblasts	Nr2f2
0	1.20653	0.295	0.008	0	Fibroblasts	Trpc3
0	1.20504	0.326	0.008	0	Fibroblasts	C1qtnf2
0	1.19865	0.28	0.016	0	Fibroblasts	Adamts1
0	1.19223	0.284	0.001	0	Fibroblasts	Foxc2
0	1.18897	0.316	0.007	0	Fibroblasts	Tgfb1i1
0	1.18626	0.364	0.036	0	Fibroblasts	Gpx8
0	1.18224	0.31	0.015	0	Fibroblasts	Slco3a1
0	1.18147	0.307	0.012	0	Fibroblasts	Nexn
0	1.17703	0.299	0.006	0	Fibroblasts	Rasl11b
0	1.16935	0.282	0.001	0	Fibroblasts	Mrvi1
0	1.15704	0.263	0.002	0	Fibroblasts	Nid1
0	1.1557	0.284	0.009	0	Fibroblasts	Rrad
0	1.1549	0.269	0.003	0	Fibroblasts	Slc2a4
0	1.13098	0.251	0.003	0	Fibroblasts	Cd248
0	1.12512	0.284	0.006	0	Fibroblasts	Rasl12
0	1.1175	0.326	0.018	0	Fibroblasts	Acadl
0	1.08334	0.263	0.003	0	Fibroblasts	AC108574.1
0	1.08035	0.284	0.014	0	Fibroblasts	Rbms1
0	1.06814	0.263	0.009	0	Fibroblasts	Ephx1
0	1.06779	0.261	0.015	0	Fibroblasts	Nr4a2
0	1.06111	0.261	0.002	0	Fibroblasts	Olfml2b
0	1.05274	0.25	0.01	0	Fibroblasts	LOC684871
0	1.05016	0.265	0.009	0	Fibroblasts	Plekhg2
0	1.02244	0.288	0.013	0	Fibroblasts	Kank2
0	1.00792	0.255	0.012	0	Fibroblasts	Itga1
6.98737e-305	1.26823	0.402	0.046	1.77472e-300	Fibroblasts	B3gnt2
2.57707e-293	1.14457	0.333	0.033	6.5455e-289	Fibroblasts	Arhgef7
7.72827e-293	1.77665	0.716	0.156	1.9629e-288	Fibroblasts	Gnai2
5.42687e-289	1.77379	0.587	0.105	1.37837e-284	Fibroblasts	Mgst3
2.92384e-288	1.20909	0.28	0.024	7.42626e-284	Fibroblasts	Plxdc2
3.05336e-288	1.10986	0.269	0.022	7.75523e-284	Fibroblasts	Tnfsf12
5.16333e-288	1.16657	0.352	0.037	1.31143e-283	Fibroblasts	Fcgrt
3.3167e-284	2.22103	0.886	0.3	8.42409e-280	Fibroblasts	Cd63
3.44142e-283	1.30238	0.421	0.052	8.74085e-279	Fibroblasts	Cdkn1c
4.8368e-283	1.21686	0.36	0.04	1.2285e-278	Fibroblasts	Tifa
1.63546e-281	1.39534	0.503	0.075	4.15391e-277	Fibroblasts	LOC108349548
1.06755e-275	1.64618	0.651	0.133	2.71148e-271	Fibroblasts	Gnb2
2.96724e-269	2.74764	0.92	0.447	7.5365e-265	Fibroblasts	Myl6
9.95422e-269	1.52102	0.602	0.113	2.52827e-264	Fibroblasts	Fermt2
1.41056e-267	2.38746	0.253	0.021	3.58268e-263	Fibroblasts	S100a4
1.53615e-267	1.0653	0.257	0.022	3.90166e-263	Fibroblasts	Ctdspl
9.72838e-257	1.14444	0.341	0.038	2.47091e-252	Fibroblasts	Oaf
4.53169e-254	1.02253	0.261	0.024	1.151e-249	Fibroblasts	Cast
7.64505e-253	1.58326	0.509	0.088	1.94177e-248	Fibroblasts	Ppp1r12c
3.56594e-249	1.17068	0.305	0.032	9.05713e-245	Fibroblasts	Akap12
3.74375e-240	1.74005	0.73	0.191	9.50876e-236	Fibroblasts	Cd81
6.28841e-237	2.58077	0.701	0.18	1.59719e-232	Fibroblasts	Fos
2.00667e-230	1.10879	0.305	0.035	5.09675e-226	Fibroblasts	Pold4
3.68143e-230	1.49789	0.834	0.238	9.35046e-226	Fibroblasts	LOC100364435
9.25039e-230	1.63156	0.619	0.143	2.34951e-225	Fibroblasts	Txn1
1.58294e-229	1.57089	0.947	0.509	4.02051e-225	Fibroblasts	Tmsb4x
2.15517e-228	1.81186	0.747	0.214	5.47391e-224	Fibroblasts	Actn4
4.47341e-222	1.49856	0.617	0.14	1.1362e-217	Fibroblasts	Psme1
2.49869e-220	1.76769	0.762	0.227	6.34642e-216	Fibroblasts	Laptm4a
5.6333e-220	1.46791	0.568	0.12	1.4308e-215	Fibroblasts	Ech1
4.55e-213	1.92903	0.821	0.302	1.15565e-208	Fibroblasts	Actb
5.78615e-207	1.16312	0.299	0.037	1.46962e-202	Fibroblasts	Arhgef25
1.36102e-204	1.25432	0.495	0.098	3.45686e-200	Fibroblasts	Arpc4
1.23267e-202	1.27163	0.364	0.056	3.13085e-198	Fibroblasts	Fry
3.66411e-199	1.21763	0.356	0.054	9.30648e-195	Fibroblasts	Stom
2.08439e-196	2.46549	0.69	0.206	5.29413e-192	Fibroblasts	Gadd45b
4.62549e-194	1.607	0.602	0.15	1.17483e-189	Fibroblasts	Tsc22d3
2.13096e-192	1.24004	0.453	0.085	5.41243e-188	Fibroblasts	Ddah2
6.00636e-190	1.81491	0.309	0.042	1.52556e-185	Fibroblasts	Fosb
1.2796e-186	1.78571	0.861	0.395	3.25004e-182	Fibroblasts	2023-09-07
3.73742e-186	1.23191	0.333	0.049	9.49266e-182	Fibroblasts	Cdkn1a
4.37069e-186	1.73704	0.808	0.312	1.11011e-181	Fibroblasts	Tsc22d1
1.11158e-174	1.47757	0.968	0.686	2.82331e-170	Fibroblasts	Tpt1
1.92031e-174	1.06151	0.358	0.059	4.8774e-170	Fibroblasts	Actn1
2.61945e-173	1.25223	0.345	0.056	6.65314e-169	Fibroblasts	Slc12a2
3.71637e-173	1.58132	0.89	0.384	9.43921e-169	Fibroblasts	Mfge8
5.01419e-170	1.53251	0.945	0.648	1.27355e-165	Fibroblasts	Rpl37a
8.80384e-162	1.18118	0.389	0.076	2.23609e-157	Fibroblasts	Maged2
7.37313e-161	1.36924	0.945	0.659	1.8727e-156	Fibroblasts	Fth1
4.16402e-159	1.16801	0.309	0.049	1.05762e-154	Fibroblasts	Hspa2
4.82524e-155	1.93011	0.337	0.06	1.22556e-150	Fibroblasts	Atp1b1
5.03143e-151	1.00268	0.368	0.069	1.27793e-146	Fibroblasts	Timp2
6.27609e-151	1.08276	0.421	0.09	1.59406e-146	Fibroblasts	Cap1
4.67113e-150	1.17242	0.463	0.108	1.18642e-145	Fibroblasts	Serinc3
7.22537e-150	1.41243	0.457	0.104	1.83517e-145	Fibroblasts	Rasl11a
4.99172e-149	1.50204	0.918	0.584	1.26785e-144	Fibroblasts	Rps16
8.0764e-149	1.14501	0.476	0.108	2.05132e-144	Fibroblasts	Egflam
1.73871e-148	1.40097	0.541	0.149	4.41614e-144	Fibroblasts	Ppp1r12a
2.73939e-147	1.47528	0.918	0.606	6.95778e-143	Fibroblasts	Rpl35
1.1408e-145	1.5554	0.867	0.509	2.89752e-141	Fibroblasts	Rps4x
4.06155e-143	1.0832	0.514	0.128	1.03159e-138	Fibroblasts	Ppp1r15a
4.05899e-141	1.48352	0.731	0.296	1.03094e-136	Fibroblasts	Rpl36al
1.352e-139	2.05063	0.564	0.184	3.43395e-135	Fibroblasts	Nme2
1.7513e-139	1.30503	0.579	0.171	4.44814e-135	Fibroblasts	Gucy1b1
2.89117e-139	1.24765	0.402	0.089	7.34329e-135	Fibroblasts	Gpx1
1.71753e-137	1.19478	0.954	0.677	4.36236e-133	Fibroblasts	Fau
1.05743e-136	1.17893	0.457	0.111	2.68577e-132	Fibroblasts	Sik1
1.02846e-133	1.47951	0.773	0.351	2.61219e-129	Fibroblasts	Map1lc3a
5.01068e-133	1.4003	0.657	0.234	1.27266e-128	Fibroblasts	Bloc1s1
1.36371e-131	1.30139	0.589	0.19	3.46369e-127	Fibroblasts	Rap1a
5.30844e-131	1.10143	0.467	0.12	1.34829e-126	Fibroblasts	Mprip
7.87058e-128	1.19108	0.939	0.692	1.99905e-123	Fibroblasts	LOC100359583
1.36919e-125	1.30535	0.907	0.584	3.4776e-121	Fibroblasts	Rpl27a
9.09969e-125	1.12494	0.632	0.209	2.31123e-120	Fibroblasts	Itm2c
5.3538e-124	1.0126	0.406	0.097	1.35981e-119	Fibroblasts	Tprg1l
6.29933e-124	1.26762	0.916	0.602	1.59997e-119	Fibroblasts	Rps23
2.91463e-122	1.21198	0.924	0.621	7.40288e-118	Fibroblasts	Rps14
3.14415e-122	1.36376	0.79	0.391	7.98582e-118	Fibroblasts	Rps5
3.27241e-122	1.21061	0.903	0.583	8.31159e-118	Fibroblasts	Rpl36
1.93004e-118	1.27099	0.84	0.42	4.90211e-114	Fibroblasts	Ptms
[truncated: 827 more rows]
