# Supplementary material for: Single-cell combined transcriptional sequencing to explore key genes and regulatory mechanisms in diabetic retinopathy
Source: Research Square preprint supplement (doi:10.21203/rs.3.rs-3174202/v1), 2023-07-31
Supplement: Supplementary file 1 [file 901e3f3309b9e23d5113123e.docx]

**Supplementary Information**

Additional files: Supplemental table1. Unique marker genes for each cell subtype from the single-cell data. Supplemental table2. Differential genes expression analysis between control and DR group. Supplemental table3. Enriched motifs and corresponding transcription factors for the 6 key genes.
