# Supplementary material for: Single-cell combined transcriptional sequencing to explore key genes and regulatory mechanisms in diabetic retinopathy
Source: Research Square preprint supplement (doi:10.21203/rs.3.rs-3174202/v1), 2023-07-31
Supplement: Supplementary file 3 [file d2ce0c8a2d1273ea0e79296b.xlsx]

## Sheet: Sheet1
geneSet	motif	NES	AUC	TF_highConf	nEnrGenes	enrichedGenes
key_gene	cisbp__M5693	4.7	0.442	OLIG3 (directAnnotation).	4	CPLX4;MMP14;PMP22;POSTN
key_gene	cisbp__M3234	4.49	0.425	BPTF (directAnnotation).	3	CPLX4;MMP14;PMP22
key_gene	cisbp__M5965	4.41	0.419	ZIC4 (directAnnotation).	3	CPLX4;MMP14;PMEPA1
key_gene	cisbp__M5691	4.38	0.417	OLIG2 (directAnnotation).	4	CPLX4;MMP14;PMP22;POSTN
key_gene	cisbp__M6500	4.27	0.407	TAL1 (directAnnotation).	5	CPLX4;MMP14;PMEPA1;PMP22;POSTN
key_gene	cisbp__M5584	4.1	0.394	ISX (directAnnotation).	3	CPLX4;MMP14;PMEPA1
key_gene	cisbp__M4780	4.05	0.389	BSX (inferredBy_Orthology).	5	CPLX4;MMP14;PMEPA1;PMP22;POSTN
key_gene	cisbp__M5982	4.01	0.387	ALX1 (inferredBy_Orthology).	3	CPLX4;MMP14;PMEPA1
key_gene	cisbp__M6113	3.95	0.381	ZIC3 (inferredBy_Orthology).	5	CD44;CPLX4;MMP14;PMEPA1;PMP22
key_gene	cisbp__M1953	3.91	0.378	BRCA1 (directAnnotation).	3	CPLX4;MMP14;PMP22
